# Supplementary material for: Self-assembling tripeptide based hydrogels and their use in removal of dyes from waste-water
Source: Royal Society of Chemistry journal article supplement (doi:10.1039/b905985g), 2009-01-01
Supplement: b905985g.pdf [file b905985g.pdf]

**Supporting Information**

**Self- assembling tripeptide based hydrogels and their use in removal of  
dyes from waste-water**

*Bimalendu Adhikari, Goutam Palui and Arindam Banerjee\**

*Department of Biological Chemistry, Indian Association for the Cultivation of Science, Jadavpur, Kolkata- 700 032, India.*

|                                    | <b>Page No.</b> |
|------------------------------------|-----------------|
| <b>Synthesis of the peptides</b>   | <b>2-12</b>     |
| <b>Figure S1 &amp; Figure S2</b>   | <b>13</b>       |
| <b>Figure S3 &amp; Figure S4</b>   | <b>14</b>       |
| <b>Figure S5 &amp; Figure S6</b>   | <b>15</b>       |
| <b>Figure S7 &amp; Figure S8</b>   | <b>16</b>       |
| <b>Figure S9 &amp; Figure S10</b>  | <b>17</b>       |
| <b>Figure S11 &amp; Figure S12</b> | <b>18</b>       |
| <b>Figure S13 &amp; Figure S14</b> | <b>19</b>       |
| <b>Figure S15 &amp; Figure S16</b> | <b>20</b>       |
| <b>Figure S17</b>                  | <b>21</b>       |
| <b>Figure S18</b>                  | <b>22</b>       |
| <b>Figure S19</b>                  | <b>23</b>       |
| <b>Figure S20</b>                  | <b>24</b>       |
| <b>Table S1 &amp; Table S2</b>     | <b>25</b>       |
| <b>References</b>                  | <b>26</b>       |

Supplementary Material (ESI) for *Soft Matter*  
This journal is © The Royal Society of Chemistry 2009

**Synthetic Procedure of Peptides.**

Peptides 1-5 were synthesized by conventional solution phase methodology by using racemization free fragment condensation strategy.<sup>S1</sup> The N-terminus was protected by the Boc- group and C-terminus was protected as a methyl ester. Couplings were mediated by dicyclohexyl carbodiimide/ 1-hydroxybenzotriazole. Deprotection of the methyl ester was performed using the saponification method. All final compounds were fully characterized by mass spectrometry, <sup>1</sup>H-NMR spectroscopy (300 MHz) and <sup>13</sup>C-NMR spectroscopy (75 MHz).

**1. Synthesis of Peptide (Boc-Leu-Phe-Phe-OH)**

(i) Synthesis of Boc-Leu-OH: The synthesis of this compound was previously reported by our group.<sup>S2</sup>

(ii) Boc-Leu(1)-Phe(2)-OMe: 3.39 g (17 mmol) of Boc-Leu-OH was dissolved in 10 mL of dry DMF in an ice-water bath. H-Phe-OMe was isolated from 7.33 g (34 mmol) of the corresponding methyl ester hydrochloride by neutralization; subsequent extraction with ethyl acetate and ethyl acetate extract was concentrated to 10 mL. It was then added to the reaction mixture, followed immediately by 3.5 g (17 mmol) of dicyclohexyl carbodiimide (DCC) and 2.30 g (17 mmol) of HOBT. The reaction mixture was allowed to come to room temperature and stirred for 3 days. The residue was taken up in ethyl acetate (40 mL) and dicyclohexylurea (DCU) was filtered off. The organic layer was washed with 1 M HCl (3 × 30 mL), brine (2 × 30 mL), 1M sodium carbonate (3 × 30 mL) and brine (2 × 30 mL) respectively. This washed organic solution was dried over anhydrous sodium sulfate and evaporated in vacuum. A white material was obtained. Yield: 5.70 g (14.52 mmol, 85.46 %).

<sup>1</sup>H NMR (300 MHz, CDCl<sub>3</sub>, 25° C, TMS):  $\delta$  7.31–7.21 (m, 5H, aromatic CH),  $\delta$  7.10 (d, <sup>3</sup>J(H, H) = 6.3 Hz, 1H, NH),  $\delta$  6.49 (d, <sup>3</sup>J(H, H) = 7.5 Hz, 1H, NH),  $\delta$  4.87–4.81 (m, 1H,  $\alpha$ CH),  $\delta$  4.13–4.08 (m, 1H,  $\alpha$ CH),  $\delta$  3.71 (s, 3H, –OCH<sub>3</sub>),  $\delta$  3.19–3.04 (m, 2H,  $\beta$  CH<sub>2</sub>),  $\delta$  1.69–1.56 (m, 3H,  $\beta$  CH<sub>2</sub> and  $\gamma$ CH),  $\delta$  1.43 (s, 9H, Boc–CH<sub>3</sub>),  $\delta$  0.92–0.89 (m, 6H,  $\delta$  CH<sub>3</sub>); Anal. Calcd. for C<sub>21</sub>H<sub>32</sub>N<sub>2</sub>O<sub>5</sub> (392.49): C, 64.26; H, 8.22; N, 20.38%. Found C, 64.20; H, 8.20; N, 20.36%. MS (ESI) m/z 415.13 (M+Na)<sup>+</sup>, 416.11(M+Na+H)<sup>+</sup>; <sup>13</sup>C NMR (75 MHz, CDCl<sub>3</sub>, 25° C):  $\delta$  172.28 (C of CO),  $\delta$  171.71 (C of CO),  $\delta$  155.52 (C of CO),  $\delta$  135.80 (one phenyl ring C attached with CH<sub>2</sub>),  $\delta$  130.66 (2C, *m*-C of phenyl ring),  $\delta$  128.54 (2C, *o*-C of phenyl ring),  $\delta$  127.76 (*p*-C of phenyl ring),  $\delta$  80.06 (tertiary C of Boc),  $\delta$  77.51-76.66 (C of CDCl<sub>3</sub>),  $\delta$  53.18 (2C,  $\alpha$  C),  $\delta$  52.29 (C of OCH<sub>3</sub>),  $\delta$  41.23 (C of  $\beta$  CH<sub>2</sub>),  $\delta$  37.92 (C of  $\beta$  CH<sub>2</sub>),  $\delta$  28.29 (3C, primary C of Boc),  $\delta$  22.88 (2C, C of  $\delta$  CH<sub>3</sub>),  $\delta$  21.94 (C of  $\gamma$  CH).

(iii) Boc-Leu(1)-Phe(2)-OH: To 4.7 g (12 mmol) of Boc-Leu(1)-Phe(2)-OMe were added 25 mL MeOH and 15 mL of 1(M) NaOH and the progress of saponification was monitored by thin-layer chromatography (TLC). The reaction mixture was stirred. After 10 h, methanol was removed under vacuum and the residue was taken in 50 mL of water and washed with diethyl ether (2 × 50 mL). The pH of the aqueous layer was then adjusted to 2-3 using 1(N) HCl, the

Supplementary Material (ESI) for *Soft Matter*  
This journal is © The Royal Society of Chemistry 2009

aqueous layer was extracted with ethyl acetate (2 × 50 mL). The extract were pooled, dried over anhydrous sodium sulfate and evaporated in vacuum. Yield: 4.16 g (10.99 mmol, 91.63 %).

<sup>1</sup>H NMR (300 MHz, DMSO-d<sub>6</sub>, 25° C): δ 12.70 (br, 1H, -COOH), δ 7.90 (d, <sup>3</sup>J(H, H) = 7.5 Hz, 1H, NH), δ 7.25–7.21 (m, 5H, aromatic CH), δ 6.85 (d, <sup>3</sup>J(H, H) = 8.4 Hz, 1H, NH), δ 4.45–4.43 (m, 1H, α CH), δ 3.98–3.94 (m, 1H, α CH), δ 3.08–3.02 (m, 1H, β CH<sub>2</sub>), δ 2.94–2.87 (m, 1H, β CH<sub>2</sub>), 1.51–1.49 (m, 3H, β CH<sub>2</sub> and γ CH), δ 1.36 (s, 9H, Boc-CH<sub>3</sub>), δ 0.85–0.76 (m, 6H, δ CH<sub>3</sub>); Anal. Calcd. for C<sub>20</sub>H<sub>30</sub>N<sub>2</sub>O<sub>5</sub> (378.46): C, 63.46; H, 7.99; N, 7.40%. Found C, 63.45; H, 8.01; N, 7.42%. MS (ESI) m/z 401.13 (M+Na)<sup>+</sup>, 402.12 (M+Na+H)<sup>+</sup>; <sup>13</sup>C NMR (75 MHz, DMSO-d<sub>6</sub>, 25° C): δ 172.81 (C of COOH), δ 172.38 (C of CONH), δ 155.15 (C of CONH), δ 137.37 (one phenyl ring C attached with CH<sub>2</sub>), δ 129.21 (2C, m-C of phenyl ring), δ 128.12 (2C, o-C of phenyl ring), δ 126.39 (p-C of phenyl ring), δ 78.03 (tertiary C of Boc), δ 53.08 (2C, α C), δ 52.58 (C of OCH<sub>3</sub>), δ 40.58–36.78 (C of DMSO-d<sub>6</sub> and two β C), δ 28.19 (3C, primary C of Boc), δ 22.92 (C of δ CH<sub>3</sub>), δ 21.59 (C of γ CH).

(iv) Boc-Leu(1)-Phe(2)-Phe(3)-OMe: 3.78 g (10 mmol) of Boc-Leu-Phe-OH was dissolved in 10 mL of dry DMF in an ice-water bath. H-Phe-OMe was isolated from 3.23 g (15 mmol) of the corresponding methyl ester hydrochloride by neutralization; subsequent extraction with ethyl acetate and ethyl acetate extract was concentrated to 10 mL. It was then added to the reaction mixture, followed immediately by 2.06 g (10 mmol) of dicyclohexyl carbodiimide (DCC) and 1.35 g (10 mmol) of HOBt. The reaction mixture was allowed to come to room temperature and stirred for 3 days. The residue was taken up in ethyl acetate (40 mL) and dicyclohexylurea (DCU) was filtered off. The organic layer was washed with 1(N) HCl (3 × 30 mL), brine (2 × 30 mL), 1(M) sodium carbonate (3 × 30 mL) and brine (2 × 30 mL), dried over anhydrous sodium sulfate and evaporated in vacuum. A white material was obtained. Yield: 4.04 g (7.48 mmol, 74.95 %).

<sup>1</sup>H NMR (300 MHz, CDCl<sub>3</sub>, 25° C, TMS): δ 7.29–7.11 (m, 8H, aromatic CH), δ 6.99–6.98 (m, 2H, aromatic CH), δ 6.66 (d, <sup>3</sup>J(H, H)=7.8 Hz, 1H, NH), δ 6.31 (d, <sup>3</sup>J(H, H) = 8.3 Hz, 1H, NH), δ 4.831 (d, <sup>3</sup>J(H, H) = 7.5 Hz, 1H, NH), δ 4.76–4.09 (m, 1H, α CH), δ 4.66–4.59 (m, 1H, α CH), δ 4.05 (br, 1H, α CH), δ 3.66 (s, 3H, -OCH<sub>3</sub>), δ 3.11–2.94 (m, 4H, β CH<sub>2</sub>), δ 1.63–1.50 (m, 3H, β CH<sub>2</sub> and γ CH), δ 1.42 (s, 9H, Boc-CH<sub>3</sub>), δ 0.89 (d, <sup>3</sup>J(H, H) = 6 Hz, 6H, δ CH<sub>3</sub>); Anal. Calcd. for C<sub>30</sub>H<sub>41</sub>N<sub>3</sub>O<sub>6</sub> (539.66): C, 66.77; H, 7.66; N, 7.79%. Found C, 66.78; H, 7.64; N, 7.80%. MS (ESI) m/z 562.05 (M+Na)<sup>+</sup>, 563.08 (M+Na+H)<sup>+</sup>, 578.06 (M+K)<sup>+</sup>, 579.07 (M+K+H)<sup>+</sup>; <sup>13</sup>C NMR (75 MHz, CDCl<sub>3</sub>, 25° C): δ 172.53 (C of CO), δ 171.34 (C of CO), δ 170.24 (C of CO), δ 155.74 (C of CO), δ 136.46 (one phenyl ring C attached with CH<sub>2</sub>), δ 135.76 (one phenyl ring C attached with CH<sub>2</sub>), δ 129.52 (2C, m-C of phenyl ring), δ 129.28 (2C, m-C of phenyl ring), δ 128.77 (2C, o-C of phenyl ring), δ 128.70 (2C, o-C of phenyl ring), δ 127.25 (p-C of phenyl ring), δ 127.17 (p-C of phenyl ring), δ 77.58 (tertiary C of Boc), δ 77.16–76.74 (C of CDCl<sub>3</sub>), δ 54.30 (α C), δ 53.59 (2C, α C),

Supplementary Material (ESI) for *Soft Matter*  
This journal is © The Royal Society of Chemistry 2009

$\delta$  52.39 (C of OCH<sub>3</sub>),  $\delta$  41.23 (C of  $\beta$  CH<sub>2</sub>),  $\delta$  38.18 (C of  $\beta$  CH<sub>2</sub>),  $\delta$  37.97 (C of  $\beta$  CH<sub>2</sub>),  $\delta$  28.42 (3C, primary C of Boc),  $\delta$  24.84 (C of  $\delta$  CH<sub>3</sub>),  $\delta$  24.44 (C of  $\delta$  CH<sub>3</sub>),  $\delta$  21.94 (C of  $\gamma$  CH).

(v) Boc-Leu(1)-Phe(2)-Phe(3)-OH: To 3.25 g (6 mmol) of Boc-Leu(1)-Phe(2)-Phe(3)-OMe were added 20 mL MeOH and 8 mL of 1(M) NaOH and the progress of saponification was monitored by thin-layer chromatography (TLC). The reaction mixture was stirred. After 10 h, methanol was removed under vacuum and the residue was taken in 50 mL of water and washed with diethyl ether (2x50 mL). The pH of the aqueous layer was then adjusted to 2-3 using 1(N) HCl, the aqueous layer was extracted with ethyl acetate (2x50 mL). The extract were pooled, dried over anhydrous sodium sulfate and evaporated in vacuum. Yield: 2.76 g (5.25 mmol, 87.62 %).

<sup>1</sup>H NMR (300 MHz, DMSO-d<sub>6</sub>, 25° C):  $\delta$  12.70 (br, 1H, -COOH),  $\delta$  8.35 (d, <sup>3</sup>J(H, H) = 7.5 Hz, 1H, NH),  $\delta$  7.69 (d, <sup>3</sup>J(H, H) = 8.1 Hz, 1H, NH),  $\delta$  7.30–7.15 (m, 10H, aromatic CH),  $\delta$  6.88 (d, <sup>3</sup>J(H, H) = 8.4 Hz, 1H, NH),  $\delta$  4.58–4.56 (m, 1H,  $\alpha$  CH),  $\delta$  4.45–4.43 (m, 1H,  $\alpha$  CH),  $\delta$  3.90–3.83 (m, 1H,  $\alpha$  CH),  $\delta$  3.09–2.71 (m, 4H,  $\beta$  CH<sub>2</sub>),  $\delta$  1.35 (s, 9H, Boc-CH<sub>3</sub>),  $\delta$  1.30–1.15 (m, 3H,  $\beta$  CH<sub>2</sub> and  $\gamma$  CH)  $\delta$  0.82–0.76 (m, 6H,  $\delta$  CH<sub>3</sub>); [ $\alpha$ ]<sub>D</sub><sup>26</sup> – 14.45 (c 1.43, CH<sub>3</sub>OH); Anal. Calcd. for C<sub>29</sub>H<sub>39</sub>N<sub>3</sub>O<sub>6</sub> (525.64): C, 66.26; H, 7.48; N, 7.99%. Found C, 66.24; H, 7.50; N, 8.04%. MS (ESI) m/z 548.08 (M+Na)<sup>+</sup>, 549.11(M+Na+H)<sup>+</sup>, 564.09 (M+K)<sup>+</sup>, 565.11 (M+K+H)<sup>+</sup>; <sup>13</sup>C NMR (75 MHz, DMSO-d<sub>6</sub>, 25° C):  $\delta$  172.68 (C of COOH),  $\delta$  172.03 (C of CONH),  $\delta$  170.97 (C of CONH),  $\delta$  155.13 (C of CONH),  $\delta$  137.45 (one phenyl ring C attached with CH<sub>2</sub>),  $\delta$  137.30 (one phenyl ring C attached with CH<sub>2</sub>),  $\delta$  129.37 (2C, *m*-C of phenyl ring),  $\delta$  129.07 (2C, *m*-C of phenyl ring),  $\delta$  128.24 (2C, *o*-C of phenyl ring),  $\delta$  127.90 (2C, *o*-C of phenyl ring),  $\delta$  126.49 (*p*-C of phenyl ring),  $\delta$  126.19 (*p*-C of phenyl ring),  $\delta$  78.15 (tertiary C of Boc),  $\delta$  53.45 ( $\alpha$  C),  $\delta$  53.03 (2C,  $\alpha$  C),  $\delta$  40.97–36.73 (C of DMSO-d<sub>6</sub> and three  $\beta$  C),  $\delta$  28.18 (3C, primary C of Boc),  $\delta$  24.17 (C of  $\gamma$  CH),  $\delta$  22.90 (C of  $\delta$  CH<sub>3</sub>),  $\delta$  21.53 (C of  $\delta$  CH<sub>3</sub>).

## 2. Peptide (Boc -Phe-Phe-Leu -OH)

(i) Synthesis of Boc-Phe-OH: The synthesis of this compound was previously reported by our group.<sup>S3</sup>

(ii) Boc- Phe(1)-Phe(2)-OMe: 4.51 g (17 mmol) of Boc-Phe-OH was dissolved in 10 mL of dry DMF in an ice-water bath. H-Phe-OMe was isolated from 7.33 g (34 mmol) of the corresponding methyl ester hydrochloride by neutralization; subsequent extraction with ethyl acetate and ethyl acetate extract was concentrated to 10 mL. It was then added to the reaction mixture, followed immediately by 3.50 g (17 mmol) of dicyclohexyl carbodiimide (DCC) and 2.29 g (17 mmol) of HOBt. The reaction mixture was allowed to come to room temperature and stirred for 3 days. The residue was taken up in ethyl acetate (40 mL) and dicyclohexylurea (DCU) was filtered off. The organic layer was washed with 1(N) HCl (3 × 30 mL), brine (2 × 30 mL), 1(M) sodium carbonate (3 × 30 mL) and brine (2 × 30 mL), dried over anhydrous sodium sulfate and evaporated in vacuum. A white material was obtained. Yield: 5.70 g (13.36 mmol, 78.62 %).

Supplementary Material (ESI) for *Soft Matter*  
This journal is © The Royal Society of Chemistry 2009

<sup>1</sup>H NMR (300 MHz, CDCl<sub>3</sub>, 25° C, TMS):  $\delta$  7.31–7.18 (m, 8H, aromatic CH),  $\delta$  6.99–6.97 (m, 2H, aromatic CH),  $\delta$  6.28 (d, <sup>3</sup>*J*(H, H) = 6.6 Hz, 1H, NH),  $\delta$  4.93 (d, <sup>3</sup>*J*(H, H) = 7.0 Hz, 1H, NH),  $\delta$  4.81–4.75 (m, 1H,  $\alpha$  CH),  $\delta$  4.34–4.32 (m, 1H,  $\alpha$  CH),  $\delta$  3.67 (s, 3H, –OCH<sub>3</sub>),  $\delta$  3.11–2.98 (m, 4H,  $\beta$  CH<sub>2</sub>),  $\delta$  1.40 (s, 9H, Boc–CH<sub>3</sub>); Anal. Calcd. for C<sub>24</sub>H<sub>30</sub>N<sub>2</sub>O<sub>5</sub> (426.51): C, 67.59; H, 7.09; N, 6.57%. Found C, 67.61; H, 7.1; N, 6.54%. MS (ESI) *m/z* 449.30 (M+Na)<sup>+</sup>, 450.30 (M+Na+H)<sup>+</sup>, 465.28 (M+K)<sup>+</sup>; <sup>13</sup>C NMR (75 MHz, CDCl<sub>3</sub>, 25° C):  $\delta$  171.46 (C of CO),  $\delta$  170.97 (C of CO),  $\delta$  155.35 (C of CO),  $\delta$  136.53 (one phenyl ring C attached with CH<sub>2</sub>),  $\delta$  135.71 (one phenyl ring C attached with CH<sub>2</sub>),  $\delta$  129.37 (2C, *m*-C of phenyl ring),  $\delta$  129.26 (2C, *m*-C of phenyl ring),  $\delta$  128.63 (2C, *o*-C of phenyl ring),  $\delta$  128.54 (2C, *o*-C of phenyl ring),  $\delta$  127.11 (*p*-C of phenyl ring),  $\delta$  126.94 (*p*-C of phenyl ring),  $\delta$  80.24 (tertiary C of Boc),  $\delta$  77.52–76.67 (C of CDCl<sub>3</sub>),  $\delta$  55.67 (C,  $\alpha$  C),  $\delta$  53.31 (C,  $\alpha$  C),  $\delta$  52.28 (C of OCH<sub>3</sub>),  $\delta$  38.30 (C of  $\beta$  CH<sub>2</sub>),  $\delta$  37.94 (C of  $\beta$  CH<sub>2</sub>),  $\delta$  28.23 (3C, primary C of Boc).

(iii) Boc-Phe(1)-Phe(2)-OH: To 5.53 g (13 mmol) of Boc-Phe(1)-Phe(2)-OMe were added 25 mL MeOH and 15 mL of 1(M) NaOH and the progress of saponification was monitored by thin-layer chromatography (TLC). The reaction mixture was stirred. After 10 h, methanol was removed under vacuum and the residue was taken in 50 mL of water and washed with diethyl ether (2  $\times$  50 mL). The pH of the aqueous layer was then adjusted to 2-3 using 1(N) HCl, the aqueous layer was extracted with ethyl acetate (2  $\times$  50 mL). The extract were pooled, dried over anhydrous sodium sulfate and evaporated in vacuum. Yield: 4.94 g (11.98 mmol, 92.16 %).

<sup>1</sup>H NMR (300 MHz, DMSO-d<sub>6</sub>, 25° C):  $\delta$  8.06 (d, <sup>3</sup>*J*(H, H) = 9 Hz, 1H, NH),  $\delta$  7.29–7.15 (m, 10H, aromatic CH),  $\delta$  6.9 (d, <sup>3</sup>*J*(H, H) = 9 Hz, 1H, NH),  $\delta$  4.47–4.40 (m, 1H,  $\alpha$  CH),  $\delta$  4.18–4.11 (m, 1H,  $\alpha$  CH),  $\delta$  3.12–3.06 (m, 2H,  $\beta$  CH<sub>2</sub>),  $\delta$  2.98–2.88 (m, 2H,  $\beta$  CH<sub>2</sub>),  $\delta$  1.28 (s, 9H, Boc–CH<sub>3</sub>); Anal. Calcd. for C<sub>23</sub>H<sub>28</sub>N<sub>2</sub>O<sub>5</sub> (412.48): C, 66.97; H, 6.84; N, 6.97%. Found C, 67.00; H, 6.86; N, 6.91%. MS (ESI) *m/z* 435.33 (M+Na)<sup>+</sup>, 436.34 (M+Na+H)<sup>+</sup>, 451.30 (M+K)<sup>+</sup>; <sup>13</sup>C NMR (75 MHz, DMSO-d<sub>6</sub>, 25° C):  $\delta$  173.34 (C of COOH),  $\delta$  172.23 (C of CONH),  $\delta$  155.65 (C of CONH),  $\delta$  138.65 (one phenyl ring C attached with CH<sub>2</sub>),  $\delta$  137.88 (one phenyl ring C attached with CH<sub>2</sub>),  $\delta$  129.78 (2C, *m*-C of phenyl ring),  $\delta$  129.73 (2C, *m*-C of phenyl ring),  $\delta$  128.74 (2C, *o*-C of phenyl ring),  $\delta$  128.53 (2C, *o*-C of phenyl ring),  $\delta$  127.01 (*p*-C of phenyl ring),  $\delta$  126.69 (*p*-C of phenyl ring),  $\delta$  78.59 (tertiary C of Boc),  $\delta$  56.24 ( $\alpha$  C),  $\delta$  53.88 ( $\alpha$  C),  $\delta$  40.86–39.19 (C of DMSO-d<sub>6</sub>),  $\delta$  38.01 (C of  $\beta$  CH<sub>2</sub>),  $\delta$  37.36 (C of  $\beta$  CH<sub>2</sub>),  $\delta$  28.66 (3C, primary C of Boc).

(iv) Boc-Phe(1)-Phe(2)-Leu(3)-OMe: 4.53 g (11 mmol) of Boc-Phe-Phe-OH was dissolved in 10 mL of dry DMF in an ice-water bath. H-Leu-OMe was isolated from 2.99 g (16.5 mmol) of the corresponding methyl ester hydrochloride by neutralization; subsequent extraction with ethyl acetate and ethyl acetate extract was concentrated to 10 mL. It was then added to the reaction mixture, followed immediately by 2.27 g (10 mmol) of dicyclohexyl carbodiimide (DCC)

Supplementary Material (ESI) for *Soft Matter*  
This journal is © The Royal Society of Chemistry 2009

and 1.49 g (10 mmol) of HOBt. The reaction mixture was allowed to come to room temperature and stirred for 3 days. The residue was taken up in ethyl acetate (40 mL) and dicyclohexylurea (DCU) was filtered off. The organic layer was washed with 1(N) HCl (3 × 30 mL), brine (2 × 30 mL), 1(M) sodium carbonate (3 × 30 mL) and brine (2 × 30 mL), dried over anhydrous sodium sulfate and evaporated in vacuum. A white material was obtained. Yield: 4.85 g (8.99 mmol, 81.65 %).

<sup>1</sup>H NMR (300 MHz, CDCl<sub>3</sub>, 25° C, TMS):  $\delta$  7.34–7.07 (m, 10H, aromatic CH),  $\delta$  6.46 (d, <sup>3</sup>J(H, H) = 6 Hz, 1H, NH),  $\delta$  6.29 (br, 1H, NH),  $\delta$  4.82 (d, <sup>3</sup>J(H, H) = 6.6 Hz, 1H, NH),  $\delta$  4.65–4.63 (m, 1H,  $\alpha$  CH), 4.51–4.48 (m, 1H,  $\alpha$  CH),  $\delta$  4.31–4.29 (m, 1H,  $\alpha$  CH),  $\delta$  3.70 (s, 3H, –OCH<sub>3</sub>),  $\delta$  3.14–2.88 (m, 4H,  $\beta$  CH<sub>2</sub>),  $\delta$  1.59–1.45 (m, 3H,  $\beta$  CH<sub>2</sub> and  $\gamma$  CH),  $\delta$  1.34 (s, 9H, Boc–CH<sub>3</sub>),  $\delta$  0.90–0.87 (m, 6H,  $\delta$  CH<sub>3</sub>); Anal. Calcd. for C<sub>30</sub>H<sub>41</sub>N<sub>3</sub>O<sub>6</sub> (539.66): C, 66.77; H, 7.66; N, 7.79%. Found C, 66.82; H, 7.68; N, 7.75%. MS (ESI) m/z 562.35 (M+Na)<sup>+</sup>, 563.37(M+Na+H)<sup>+</sup>; <sup>13</sup>C NMR (75 MHz, CDCl<sub>3</sub>, 25° C):  $\delta$  172.73 (C of CO),  $\delta$  171.19 (C of CO),  $\delta$  170.28 (C of CO),  $\delta$  155.74 (C of CO),  $\delta$  136.39 (one phenyl ring C attached with CH<sub>2</sub>),  $\delta$  136.36 (one phenyl ring C attached with CH<sub>2</sub>),  $\delta$  129.50 (2C, *m*-C of phenyl ring),  $\delta$  129.40 (2C, *m*-C of phenyl ring),  $\delta$  128.95 (2C, *o*-C of phenyl ring),  $\delta$  128.80 (2C, *o*-C of phenyl ring),  $\delta$  127.31 (*p*-C of phenyl ring),  $\delta$  127.22 (*p*-C of phenyl ring),  $\delta$  77.58 (tertiary C of Boc),  $\delta$  77.36–75.73 (C of CDCl<sub>3</sub>),  $\delta$  55.95 (C,  $\alpha$  C),  $\delta$  54.21 (C,  $\alpha$  C),  $\delta$  52.39 (C of OCH<sub>3</sub>),  $\delta$  51.07 (C,  $\alpha$  C),  $\delta$  41.36 (C of  $\beta$  CH<sub>2</sub>),  $\delta$  37.99 (2C of  $\beta$  CH<sub>2</sub>),  $\delta$  28.31 (3C, primary C of Boc),  $\delta$  24.76 (C of  $\gamma$  CH),  $\delta$  22.84 (C of  $\delta$  CH<sub>3</sub>),  $\delta$  21.98 (C of  $\delta$  CH<sub>3</sub>).

(v) Boc-Phe(1)-Phe(2)-Leu(3)-OH: To 3.25 g (6 mmol) of Boc-Phe(1)-Phe(2)-Leu(3)-OMe were added 20 mL MeOH and 8 mL of 1(M) NaOH and the progress of saponification was monitored by thin-layer chromatography (TLC). The reaction mixture was stirred. After 10 h, methanol was removed under vacuum and the residue was taken in 50 mL of water and washed with diethyl ether (2x50 mL). The pH of the aqueous layer was then adjusted to 2-3 using 1(N) HCl, the aqueous layer was extracted with ethyl acetate (2x50 mL). The extract were pooled, dried over anhydrous sodium sulfate and evaporated in vacuum. Yield: 2.76 g (5.25 mmol, 87.62 %).

<sup>1</sup>H NMR (300 MHz, DMSO-d<sub>6</sub>, 25° C):  $\delta$  12.57 (br, 1H, –COOH),  $\delta$  8.30 (d, <sup>3</sup>J(H, H) = 7.89 Hz, 1H, NH),  $\delta$  7.91 (d, <sup>3</sup>J(H, H) = 8.25 Hz, 1H, NH),  $\delta$  7.27–7.18 (m, 10H, aromatic CH),  $\delta$  6.87 (d, <sup>3</sup>J(H, H) = 8.55 Hz, 1H, NH),  $\delta$  4.62–4.60 (m, 1H,  $\alpha$  CH),  $\delta$  4.30–4.22 (m, 1H,  $\alpha$  CH),  $\delta$  4.09 (br, 1H,  $\alpha$  CH),  $\delta$  3.09–3.03 (m, 1H,  $\beta$  CH<sub>2</sub>),  $\delta$  2.86–2.78 (m, 2H,  $\beta$  CH<sub>2</sub>),  $\delta$  2.68–2.60 (m, 1H,  $\beta$  CH<sub>2</sub>),  $\delta$  1.64–1.52 (m, 3H,  $\beta$  CH<sub>2</sub> and  $\gamma$  CH),  $\delta$  1.28 (s, 9H, Boc–CH<sub>3</sub>),  $\delta$  0.92–0.84 (m, 6H,  $\delta$  CH<sub>3</sub>); [ $\alpha$ ]<sub>D</sub><sup>26</sup> – 23.11 (c 1.01, CH<sub>3</sub>OH); Anal. Calcd. for C<sub>29</sub>H<sub>39</sub>N<sub>3</sub>O<sub>6</sub> (525.64): C, 66.26; H, 7.48; N, 7.99%. Found C, 66.30; H, 7.50; N, 7.95%. MS (ESI) m/z 548.28 (M+Na)<sup>+</sup>, 549.29 (M+Na+H)<sup>+</sup>, 564.26 (M+K)<sup>+</sup>; <sup>13</sup>C NMR (75 MHz, DMSO-d<sub>6</sub>, 25° C):  $\delta$  174.69 (C of COOH),  $\delta$  172.12 (C of CONH),  $\delta$  171.74 (C of CONH),  $\delta$  155.86 (C of CONH),  $\delta$  138.94 (one phenyl ring C attached with CH<sub>2</sub>),  $\delta$  138.93 (one phenyl ring C attached with CH<sub>2</sub>),  $\delta$  130.25

Supplementary Material (ESI) for *Soft Matter*  
This journal is © The Royal Society of Chemistry 2009

(2C, *m*-C of phenyl ring),  $\delta$  129.96 (2C, *m*-C of phenyl ring),  $\delta$  128.82 (4C, *o*-C of phenyl ring),  $\delta$  127.09 (*p*-C of phenyl ring),  $\delta$  126.98 (*p*-C of phenyl ring),  $\delta$  78.98 (tertiary C of Boc),  $\delta$  56.77 ( $\alpha$  C),  $\delta$  54.10 ( $\alpha$  C),  $\delta$  51.08 ( $\alpha$  C),  $\delta$  41.22–38.34 (C of DMSO- $d_6$  and three  $\beta$  C),  $\delta$  28.94 (3C, primary C of Boc),  $\delta$  25.12 (C of  $\gamma$  CH),  $\delta$  23.70 (C of  $\delta$  CH<sub>3</sub>),  $\delta$  22.17 (C of  $\delta$  CH<sub>3</sub>).

### 3. Peptide (Boc-Leu-Phe-Leu -OH)

(i) Synthesis of Boc-Leu-Phe-OH: This compound has been prepared according to the above mentioned procedure for the synthesis of peptide **1**.

(ii) Boc-Leu(1)-Phe(2)-Leu(3)-OMe: 3.78 g (10 mmol) of Boc-Leu-Phe-OH was dissolved in 10 mL of dry DMF in an ice-water bath. H-Leu-OMe was isolated from 2.72 g (15 mmol) of the corresponding methyl ester hydrochloride by neutralization; subsequent extraction with ethyl acetate and ethyl acetate extract was concentrated to 10 mL. It was then added to the reaction mixture, followed immediately by 3.09 g (10 mmol) of dicyclohexyl carbodiimide (DCC) and 2.02 g (10 mmol) of HOBt. The reaction mixture was allowed to come to room temperature and stirred for 3 days. The residue was taken up in ethyl acetate (40 mL) and dicyclohexylurea (DCU) was filtered off. The organic layer was washed with 1(N) HCl (3  $\times$  30 mL), brine (2  $\times$  30 mL), 1(M) sodium carbonate (3  $\times$  30 mL) and brine (2  $\times$  30 mL), dried over anhydrous sodium sulfate and evaporated in vacuum. A white material was obtained. Yield: 3.84 g (7.59 mmol, 75.89%)

<sup>1</sup>H NMR (300 MHz, CDCl<sub>3</sub>, 25° C, TMS):  $\delta$  7.31–7.16 (m, 5H, aromatic CH),  $\delta$  6.69 (d, <sup>3</sup>*J*(H, H)=7.2 Hz 1H, NH),  $\delta$  6.44 (br, 1H, NH),  $\delta$  4.81 (d, <sup>3</sup>*J*(H, H) = 6.6 Hz, 1H, NH),  $\delta$  4.72–4.65 (m, 1H,  $\alpha$  CH), 4.52–4.50 (m, 1H,  $\alpha$  CH),  $\delta$  4.05 (br, 1H,  $\alpha$  CH),  $\delta$  3.69 (s, 3H, –OCH<sub>3</sub>),  $\delta$  3.14–3.01 (m, 2H,  $\beta$  CH<sub>2</sub>),  $\delta$  1.61–1.46 (m, 6H,  $\beta$  CH<sub>2</sub> and  $\gamma$  CH),  $\delta$  1.40 (s, 9H, Boc–CH<sub>3</sub>),  $\delta$  0.90–0.86 (m, 12H,  $\delta$  CH<sub>3</sub>); Anal. Calcd. for C<sub>27</sub>H<sub>43</sub>N<sub>3</sub>O<sub>6</sub> (505.65): C, 64.13; H, 8.57; N, 8.31%. Found C, 64.15; H, 8.6; N, 8.29%. MS (ESI) *m/z* 528.14 (M+Na)<sup>+</sup>, 529.16 (M+Na+H)<sup>+</sup>; <sup>13</sup>C NMR (75 MHz, CDCl<sub>3</sub>, 25° C):  $\delta$  172.71 (C of CO),  $\delta$  171.69 (C of CO),  $\delta$  171.60 (C of CO),  $\delta$  155.77 (C of CO),  $\delta$  135.84 (one phenyl ring C attached with CH<sub>2</sub>),  $\delta$  129.25 (2C, *m*-C of phenyl ring),  $\delta$  128.55 (2C, *o*-C of phenyl ring),  $\delta$  127.08 (C of phenyl ring),  $\delta$  80.04 (tertiary C of Boc),  $\delta$  77.53–76.68 (C of CDCl<sub>3</sub>),  $\delta$  53.38 ( $\alpha$  C),  $\delta$  52.97 ( $\alpha$  C),  $\delta$  52.22 (C of OCH<sub>3</sub>),  $\delta$  51.69 ( $\alpha$  C),  $\delta$  41.05 (C of  $\beta$  CH<sub>2</sub>),  $\delta$  40.84 (C of  $\beta$  CH<sub>2</sub>),  $\delta$  37.91 (C of  $\beta$  CH<sub>2</sub>),  $\delta$  29.39 (3C, primary C of Boc),  $\delta$  24.63 (2C, C of  $\delta$  CH<sub>3</sub>),  $\delta$  24.58 (2C, C of  $\delta$  CH<sub>3</sub>),  $\delta$  22.99 (C of  $\gamma$  CH),  $\delta$  22.86 (C of  $\gamma$  CH).

(iii) Boc-Leu(1)-Phe(2)-Leu(3)-OH: To 3.35 g (7 mmol) of Boc-Leu(1)-Phe(2)-Leu(3)-OMe were added 20 mL MeOH and 8 mL of 1(M) NaOH and the progress of saponification was monitored by thin-layer chromatography (TLC). The reaction mixture was stirred. After 10 h, methanol was removed under vacuum and the residue was taken in 50 mL of water and washed with diethyl ether (2 $\times$ 50 mL). The pH of the aqueous layer was then adjusted to 2–3 using 1(N) HCl,

Supplementary Material (ESI) for *Soft Matter*  
This journal is © The Royal Society of Chemistry 2009

the aqueous layer was extracted with ethyl acetate (2x50 mL). The extract were pooled, dried over anhydrous sodium sulfate and evaporated in vacuum. Yield: 2.95 g (6 mmol, 85.76%).

<sup>1</sup>H NMR (300 MHz, DMSO-d<sub>6</sub>, 25° C):  $\delta$  12.56 (br, 1H, -COOH),  $\delta$  8.26 (d, <sup>3</sup>J(H, H) = 7.7 Hz, 1H, NH),  $\delta$  7.72 (d, <sup>3</sup>J(H, H) = 8.18 Hz, 1H, NH),  $\delta$  7.21–7.16 (m, 5H, aromatic CH),  $\delta$  6.91 (d, <sup>3</sup>J(H, H)=8.29 Hz, 1H, NH),  $\delta$  4.59–4.58 (m, 1H,  $\alpha$  CH),  $\delta$  4.25–4.23 (m, 1H,  $\alpha$  CH),  $\delta$  3.88–3.86 (br, 1H,  $\alpha$  CH),  $\delta$  3.05–2.99 (m, 1H,  $\beta$  CH<sub>2</sub>),  $\delta$  2.82–2.75 (m, 1H,  $\beta$  CH<sub>2</sub>),  $\delta$  1.55–1.50 (m, 4H,  $\beta$  CH<sub>2</sub>),  $\delta$  1.36 (s, 9H, Boc-CH<sub>3</sub>),  $\delta$  1.30–1.25 (m, 2H,  $\gamma$  CH),  $\delta$  0.90–0.72 (m, 12H,  $\delta$  CH<sub>3</sub>); [ $\alpha$ ]<sub>D</sub><sup>26</sup> -33.81 (c 1.17, CH<sub>3</sub>OH); Anal. Calcd. for C<sub>26</sub>H<sub>41</sub>N<sub>3</sub>O<sub>6</sub> (491.62): C, 63.52; H, 8.41; N, 8.55%. Found C, 63.50; H, 8.44; N, 8.53%. MS (ESI) m/z 514.39 (M+Na)<sup>+</sup>, 515.37 (M+Na+H)<sup>+</sup>, 530.35 (M+K)<sup>+</sup>; <sup>13</sup>C NMR (75 MHz, DMSO-d<sub>6</sub>, 25° C):  $\delta$  174.654 (C of COOH),  $\delta$  172.92 (C of CONH),  $\delta$  171.71 (C of CONH),  $\delta$  155.97 (C of CONH),  $\delta$  138.29 (one phenyl ring C attached with CH<sub>2</sub>),  $\delta$  130.20 (2C, *m*-C of phenyl ring),  $\delta$  128.72 (2C, *o*-C of phenyl ring),  $\delta$  126.99 (*p*-C of phenyl ring),  $\delta$  78.94 (tertiary C of Boc),  $\delta$  53.99 ( $\alpha$  C),  $\delta$  53.78 ( $\alpha$  C),  $\delta$  51.05 ( $\alpha$  C),  $\delta$  41.75–38.55 (C of DMSO-d<sub>6</sub> and three  $\beta$  C),  $\delta$  29.03 (3C, primary C of Boc),  $\delta$  25.07 (C of  $\gamma$  CH),  $\delta$  25.01 (C of  $\gamma$  CH),  $\delta$  23.69 (2C, C of  $\delta$  CH<sub>3</sub>),  $\delta$  22.14 (2C, C of  $\delta$  CH<sub>3</sub>).

#### 4. Synthesis of Peptide (Boc-Val-Phe-Phe-OH)

(i) Synthesis of Boc-Val-OH: A solution of L-Valine (2.34 g, 20 mmol) in a mixture of dioxane (40mL), water (20mL) and 1M NaOH (20mL) was stirred and cooled in an ice water bath. Di-tert-butyl pyrocarbonate (4.8 g, 22 mmol) was added and stirring was continued at room temperature for 6 h. Then the solution was concentrated in vacuum to about 20-25 mL, cooled in an ice water bath, covered with a layer of ethyl acetate (about 20 mL), and acidified with a dilute solution of KHSO<sub>4</sub> to pH 2-3 (congo red). The aqueous phase was extracted with ethyl acetate and this operation was done repeatedly. The ethyl acetate extract were pooled, washed with water, dried over anhydrous Na<sub>2</sub>SO<sub>4</sub> and evaporated in vacuum. The pure material was obtained as a waxy solid.

Yield: 3.95 g (18.2 mmol, 91%); Anal. Calcd. for C<sub>10</sub>H<sub>19</sub>NO<sub>4</sub> (217.26): C, 55.28; H, 8.81; N, 6.45%. Found C, 55.30; H, 8.85; N, 6.40%.

(ii) Boc-Val(1)-Phe(2)-OMe: 3.69 g (17mmol) of Boc-Val-OH was dissolved in 10 mL of dry DMF in an ice-water bath. H-Phe-OMe was isolated from 7.33 g (34 mmol) of the corresponding methyl ester hydrochloride by neutralization; subsequent extraction with ethyl acetate and ethyl acetate extract was concentrated to 10 mL. It was then added to the reaction mixture, followed immediately by 3.5 g (17 mmol) of dicyclohexyl carbodiimide (DCC) and 2.297 g (17 mmol) of HOBt. The reaction mixture was allowed to come to room temperature and stirred for 3 days. The residue was taken up in ethyl acetate (40 mL) and dicyclohexylurea (DCU) was filtered off. The organic layer was washed with 1(N) HCl (3 × 30 mL), brine (2 × 30 mL), 1(M) sodium carbonate (3 × 30 mL) and brine (2 × 30 mL),

Supplementary Material (ESI) for *Soft Matter*  
This journal is © The Royal Society of Chemistry 2009

dried over anhydrous sodium sulfate and evaporated in vacuum. A white material was obtained. Yield: 5.29 g (13.98 mmol, 82.27 %).

$^1\text{H}$  NMR (300 MHz,  $\text{CDCl}_3$ , 25° C, TMS):  $\delta$  7.32–7.22 (m, 3H, aromatic CH),  $\delta$  7.13–7.10 (m, 2H, aromatic CH),  $\delta$  6.35 (d,  $^3J(\text{H}, \text{H})=6.3$  Hz, 1H, NH),  $\delta$  5.03 (d,  $^3J(\text{H}, \text{H})=7.5$  Hz, 1H, NH),  $\delta$  4.90–4.84 (m, 1H,  $\alpha$  CH),  $\delta$  3.93–3.88 (m, 1H,  $\alpha$  CH),  $\delta$  3.73 (s, 3H,  $-\text{OCH}_3$ ),  $\delta$  3.13–3.10 (m, 2H,  $\beta$   $\text{CH}_2$ ),  $\delta$  2.12–2.05 (m, 1H,  $\beta$  CH),  $\delta$  1.45 (s, 9H, Boc- $\text{CH}_3$ ),  $\delta$  0.93–0.86 (m, 6H,  $\gamma$   $\text{CH}_3$ ); Anal. Calcd. for  $\text{C}_{20}\text{H}_{30}\text{N}_2\text{O}_5$  (378.46): C, 63.47; H, 7.99; N, 7.40%. Found C, 63.51; H, 8.01; N, 7.35%. MS (ESI)  $m/z$  401.05 ( $\text{M}+\text{Na}$ ) $^+$ , 402.03 ( $\text{M}+\text{Na}+\text{H}$ ) $^+$ , 417.02 ( $\text{M}+\text{K}$ ) $^+$ ;  $^{13}\text{C}$  NMR (75 MHz,  $\text{CDCl}_3$ , 25° C):  $\delta$  171.84 (C of CO),  $\delta$  171.28 (C of CO),  $\delta$  155.47 (C of CO),  $\delta$  136.68 (one phenyl ring C attached with  $\text{CH}_2$ ),  $\delta$  129.34 (2C,  $m$ -C of phenyl ring),  $\delta$  128.62 (2C,  $o$ -C of phenyl ring),  $\delta$  126.88 ( $p$ -C of phenyl ring),  $\delta$  80.18 (tertiary C of Boc),  $\delta$  77.52–76.67 (C of  $\text{CDCl}_3$ ),  $\delta$  57.27 (C,  $\alpha$  C),  $\delta$  55.82 (C,  $\alpha$  C),  $\delta$  52.06 (C of  $\text{OCH}_3$ ),  $\delta$  38.04 (C of  $\beta$   $\text{CH}_2$ ),  $\delta$  31.25 (C of  $\beta$   $\text{CH}_2$ ),  $\delta$  28.26 (3C, primary C of Boc),  $\delta$  18.83 (C of  $\gamma$  CH),  $\delta$  17.79 (C of  $\gamma$  CH).

(iii) Boc-Val(1)-Phe(2)-OH: To 4.54 g (12 mmol) of Boc-Val(1)-Phe(2)-OMe were added 25 mL MeOH and 15 mL of 1(M) NaOH and the progress of saponification was monitored by thin-layer chromatography (TLC). The reaction mixture was stirred. After 10 h, methanol was removed under vacuum and the residue was taken in 50 mL of water and washed with diethyl ether ( $2 \times 50$  mL). The pH of the aqueous layer was then adjusted to 2-3 using 1(N) HCl, the aqueous layer was extracted with ethyl acetate ( $2 \times 50$  mL). The extract were pooled, dried over anhydrous sodium sulfate and evaporated in vacuum. Yield: 4.19 g (11.50 mmol, 95.88%).

$^1\text{H}$  NMR (300 MHz,  $\text{DMSO}-d_6$ , 25° C):  $\delta$  12.62 (br, 1H,  $-\text{COOH}$ ),  $\delta$  8.06 (d,  $^3J(\text{H}, \text{H})=7.8$  Hz, 1H, NH),  $\delta$  7.28–7.17 (m, 5H, aromatic CH),  $\delta$  6.59 (d,  $^3J(\text{H}, \text{H})=9.3$  Hz, 1H, NH),  $\delta$  4.48–4.40 (m, 1H,  $\alpha$  CH),  $\delta$  3.78–3.73 (m, 1H,  $\alpha$  CH),  $\delta$  3.08–3.02 (m, 1H,  $\beta$   $\text{CH}_2$ ),  $\delta$  2.92–2.84 (m, 1H,  $\beta$   $\text{CH}_2$ ),  $\delta$  1.87–1.81 (m, 1H,  $\beta$  CH),  $\delta$  1.37 (s, 9H, Boc- $\text{CH}_3$ ),  $\delta$  0.77–0.73 (m, 6H,  $\gamma$   $\text{CH}_3$ ); Anal. Calcd. for  $\text{C}_{19}\text{H}_{28}\text{N}_2\text{O}_5$  (364.44): C, 62.62; H, 7.74; N, 7.69%. Found C, 62.24; H, 7.78; N 7.66%. MS (ESI)  $m/z$  387 ( $\text{M}+\text{Na}$ ) $^+$ , 403.01 ( $\text{M}+\text{K}$ ) $^+$ , 404.00 ( $\text{M}+\text{K}+\text{H}$ ) $^+$ ;  $^{13}\text{C}$  NMR (75 MHz,  $\text{DMSO}-d_6$ , 25° C):  $\delta$  173.36 (C of COOH),  $\delta$  172.39 (C of CONH),  $\delta$  155.72 (C of CONH),  $\delta$  138.64 (one phenyl ring C attached with  $\text{CH}_2$ ),  $\delta$  129.68 (2C,  $m$ -C of phenyl ring),  $\delta$  128.45 (2C,  $o$ -C of phenyl ring),  $\delta$  126.63 ( $p$ -C of phenyl ring),  $\delta$  78.53 (tertiary C of Boc),  $\delta$  57.44 ( $\alpha$  C),  $\delta$  56.10 ( $\alpha$  C),  $\delta$  40.78–39.12 (C of  $\text{DMSO}-d_6$ ),  $\delta$  37.69 ( $\beta$  C),  $\delta$  30.66 ( $\beta$  C),  $\delta$  28.57 (3C, primary C of Boc),  $\delta$  19.50 (C of  $\gamma$   $\text{CH}_3$ ),  $\delta$  18.33 (C of  $\gamma$   $\text{CH}_3$ ).

(iv) Boc-Val(1)-Phe(2)-Phe(3)-OMe: 3.64 g (10 mmol) of Boc-Val-Phe-OH was dissolved in 10 mL of dry DMF in an ice-water bath. H-Phe-OMe was isolated from 3.24 g (15 mmol) of the corresponding methyl ester hydrochloride by neutralization; subsequent extraction with ethyl acetate and ethyl acetate extract was concentrated to 10 mL. It was then added to the reaction mixture, followed immediately by 2.06 g (10 mmol) of dicyclohexyl carbodiimide (DCC)

Supplementary Material (ESI) for *Soft Matter*  
This journal is © The Royal Society of Chemistry 2009

and 1.35 g (10 mmol) of HOBt. The reaction mixture was allowed to come to room temperature and stirred for 3 days. The residue was taken up in ethyl acetate (40 mL) and dicyclohexylurea (DCU) was filtered off. The organic layer was washed with 1(N) HCl (3 × 30 mL), brine (2 × 30 mL), 1(M) sodium carbonate (3 × 30 mL) and brine (2 × 30 mL), dried over anhydrous sodium sulfate and evaporated in vacuum. A white material was obtained. Yield: 4.20 g (8 mmol, 79.84 %).

<sup>1</sup>H NMR (300 MHz, CDCl<sub>3</sub>, 25° C, TMS): δ 7.29–7.18 (m, 8H, aromatic CH), δ 6.98–6.95 (m, 2H, aromatic CH), δ 6.60 (d, <sup>3</sup>J(H, H) = 7.8 Hz, 1H, NH), δ 6.33 (d, <sup>3</sup>J(H, H) = 7.9 Hz, 1H, NH), δ 5.00 (d, <sup>3</sup>J(H, H) = 8.1 Hz, 1H, NH), δ 4.76–4.65 (m, 2H, 2α CH), δ 3.94–3.89 (m, 1H, α CH), δ 3.64 (s, 3H, –OCH<sub>3</sub>), δ 3.13–2.94 (m, 4H, β CH<sub>2</sub>), δ 2.10–2.04 (m, 1H, β CH), δ 1.43 (s, 9H, Boc–CH<sub>3</sub>), δ 0.88–0.78 (m, 6H, γ CH<sub>3</sub>); Anal. Calcd. for C<sub>29</sub>H<sub>39</sub>N<sub>3</sub>O<sub>6</sub> (525.64): C, 66.26; H, 7.48; N, 7.99%. Found C, 66.31; H, 7.50; N, 7.95%. MS (ESI) m/z 548.11 (M+Na)<sup>+</sup>, 549.13(M+Na+H)<sup>+</sup>, 564.10 (M+K)<sup>+</sup>; <sup>13</sup>C NMR (75 MHz, CDCl<sub>3</sub>, 25° C): δ 171.49 (C of CO), δ 171.19 (C of CO), δ 170.16 (C of CO), δ 155.78 (C of CO), δ 136.25 (one phenyl ring C attached with CH<sub>2</sub>), δ 135.61 (one phenyl ring C attached with CH<sub>2</sub>), δ 129.33 (2C, *m*-C of phenyl ring), δ 129.11 (2C, *m*-C of phenyl ring), δ 128.58 (2C, *o*-C of phenyl ring), δ 128.49 (2C, *o*-C of phenyl ring), δ 127.04 (*p*-C of phenyl ring), δ 126.96 (*p*-C of phenyl ring), δ 79.89 (tertiary C of Boc), δ 77.45–76.61 (C of CDCl<sub>3</sub>), δ 59.94 (C, α C), δ 54.10 (C, α C), δ 53.41 (C, α C), δ 52.18 (C of OCH<sub>3</sub>), δ 38.24 (C of β CH<sub>2</sub>), δ 37.85 (C of β CH<sub>2</sub>), δ 30.71 (C of β CH<sub>2</sub>), δ 28.27 (3C, primary C of Boc), δ 19.18 (C of γ CH<sub>3</sub>), δ 17.49 (C of γ CH<sub>3</sub>).

(v) Boc-Val(1)-Phe(2)-Phe(3)-OH: To 3.67 g (7 mmol) of Boc-Val(1)-Phe(2)-Phe(3)-OMe were added 20 mL MeOH and 8 mL of 1(M) NaOH and the progress of saponification was monitored by thin-layer chromatography (TLC). The reaction mixture was stirred. After 10 h, methanol was removed under vacuum and the residue was taken in 50 mL of water and washed with diethyl ether (2x50 mL). The pH of the aqueous layer was then adjusted to 2-3 using 1(N) HCl, the aqueous layer was extracted with ethyl acetate (2x50 mL). The extract were pooled, dried over anhydrous sodium sulfate and evaporated in vacuum. Yield: 3.22 g (6.29 mmol, 89.94 %).

<sup>1</sup>H NMR (300 MHz, DMSO-d<sub>6</sub>, 25° C): δ 12.50 (br, 1H, –COOH), δ 8.34 (d, <sup>3</sup>J(H, H) = 7.8 Hz, 1H, NH), δ 7.84 (d, <sup>3</sup>J(H, H) = 8.4 Hz, 1H, NH), δ 7.29–7.15 (m, 10H, aromatic CH), δ 6.62 (d, <sup>3</sup>J(H, H) = 9.3 Hz, 1H, NH), δ 4.64–4.61 (m, 1H, α CH), δ 4.52–4.41 (m, 1H, α CH), δ 3.73–3.67 (m, 1H, α CH), δ 3.11–2.88 (m, 3H, β CH<sub>2</sub>), δ 2.77–2.69 (m, 1H, β CH<sub>2</sub>), δ 1.79–1.73 (m, 1H, β CH), δ 1.37 (s, 9H, Boc–CH<sub>3</sub>), δ 0.67–0.61 (m, 6H, γ CH<sub>3</sub>); [α]<sub>D</sub><sup>26</sup> –18.03 (c 1.31, CH<sub>3</sub>OH); Anal. Calcd. for C<sub>28</sub>H<sub>37</sub>N<sub>3</sub>O<sub>6</sub> (511.61): C, 65.73; H, 7.29; N, 8.21%. Found C, 65.75; H, 7.33; N, 8.16%. MS (ESI) m/z 534.42 (M+Na)<sup>+</sup>, 535.46(M+Na+H)<sup>+</sup>; <sup>13</sup>C NMR (75 MHz, DMSO-d<sub>6</sub>, 25° C): δ 172.54 (C of COOH), δ 171.02 (C of CONH), δ 170.85 (C of CONH), δ 155.20 (C of CONH), δ 137.54 (one phenyl ring C attached with CH<sub>2</sub>), δ 137.24 (one phenyl ring C attached with CH<sub>2</sub>), δ 129.19 (2C, *m*-C of phenyl ring), δ 129.01 (2C, *m*-C of phenyl ring),

Supplementary Material (ESI) for *Soft Matter*  
This journal is © The Royal Society of Chemistry 2009

$\delta$  128.15 (2C, *o*-C of phenyl ring),  $\delta$  127.89 (2C, *o*-C of phenyl ring),  $\delta$  126.40 (*p*-C of phenyl ring),  $\delta$  126.13 (*p*-C of phenyl ring),  $\delta$  78.02 (tertiary C of Boc),  $\delta$  59.89 ( $\alpha$  C),  $\delta$  53.35 ( $\alpha$  C),  $\delta$  53.22 ( $\alpha$  C),  $\delta$  40.33–38.66 (C of DMSO- $d_6$ ),  $\delta$  37.81 ( $\beta$  C),  $\delta$  36.72 ( $\beta$  C),  $\delta$  30.52 ( $\beta$  C),  $\delta$  28.12 (3C, primary C of Boc),  $\delta$  19.08 (C of  $\gamma$  CH<sub>3</sub>),  $\delta$  17.99 (C of  $\gamma$  CH<sub>3</sub>).

**5. Synthesis of Peptide (Boc -Phe-Phe-Val -OH)**

(i) Synthesis of Boc-Phe-Phe-OH: This compound has been prepared according to peptide 2.

(ii) Boc-Phe(1)-Phe(2)-Val (3)-OMe: 4.53 g (11 mmol) of Boc-Phe-Phe-OH was dissolved in 10 mL of dry DMF in an ice-water bath. H-Val-OMe was isolated from 2.76 g (11.60 mmol) of the corresponding methyl ester hydrochloride by neutralization; subsequent extraction with ethyl acetate and ethyl acetate extract was concentrated to 10 mL. It was then added to the reaction mixture, followed immediately by 2.27 g (11 mmol) of dicyclohexyl carbodiimide (DCC) and 1.49 g (11 mmol) of HOBt. The reaction mixture was allowed to come to room temperature and stirred for 3 days. The residue was taken up in ethyl acetate (40 mL) and dicyclohexylurea (DCU) was filtered off. The organic layer was washed with 1(N) HCl (3  $\times$  30 mL), brine (2  $\times$  30 mL), 1(M) sodium carbonate (3  $\times$  30 mL) and brine (2  $\times$  30 mL), dried over anhydrous sodium sulfate and evaporated in vacuum. A white material was obtained. Yield: 4.73 g (9 mmol, 81.83 %).

<sup>1</sup>H NMR (300 MHz, CDCl<sub>3</sub>, 25° C, TMS):  $\delta$  7.31–7.09 (m, 10H, aromatic CH),  $\delta$  6.58 (d, <sup>3</sup>*J*(H, H) = 7.2 Hz, 1H, NH),  $\delta$  6.35 (d, <sup>3</sup>*J*(H, H) = 7.5 Hz, 1H, NH),  $\delta$  4.91 (d, <sup>3</sup>*J*(H, H) = 5.4 Hz, 1H, NH),  $\delta$  4.68–4.61 (m, 1H,  $\alpha$  CH),  $\delta$  4.42–4.34 (m, 2H, 2 $\alpha$  CH),  $\delta$  3.69 (s, 3H, –OCH<sub>3</sub>),  $\delta$  3.31–2.90 (m, 4H,  $\beta$  CH<sub>2</sub>),  $\delta$  2.10–2.01 (m, 1H,  $\beta$  CH),  $\delta$  1.36 (s, 9H, Boc–CH<sub>3</sub>),  $\delta$  0.86–0.74 (m, 6H,  $\gamma$ CH<sub>3</sub>); Anal. Calcd. for C<sub>29</sub>H<sub>39</sub>N<sub>3</sub>O<sub>6</sub> (525.64): C, 66.26; H, 7.48; N, 7.99%. Found C, 66.28; H, 7.55; N, 8.04%. MS (ESI) *m/z* 548.30 (M+Na)<sup>+</sup>, 549.31(M+Na+H)<sup>+</sup>, 564.29 (M+K)<sup>+</sup>; <sup>13</sup>C NMR (75 MHz, CDCl<sub>3</sub>, 25° C):  $\delta$  171.57 (C of CO),  $\delta$  171.19 (C of CO),  $\delta$  170.28 (C of CO),  $\delta$  155.28 (C of CO),  $\delta$  136.37 (one phenyl ring C attached with CH<sub>2</sub>),  $\delta$  136.25 (one phenyl ring C attached with CH<sub>2</sub>),  $\delta$  129.31 (2C, *m*-C of phenyl ring),  $\delta$  129.28 (2C, *m*-C of phenyl ring),  $\delta$  128.76 (2C, *o*-C of phenyl ring),  $\delta$  128.68 (2C, *o*-C of phenyl ring),  $\delta$  127.09 (*p*-C of phenyl ring),  $\delta$  127.05 (*p*-C of phenyl ring),  $\delta$  80.44 (tertiary C of Boc),  $\delta$  77.46–76.61 (C of CDCl<sub>3</sub>),  $\delta$  57.49 ( $\alpha$  C),  $\delta$  55.81 ( $\alpha$  C),  $\delta$  54.48 ( $\alpha$  C),  $\delta$  52.09 (C of OCH<sub>3</sub>),  $\delta$  37.98 (2C,  $\beta$  C),  $\delta$  31.07 ( $\beta$  C),  $\delta$  28.21 (3C, primary C of Boc),  $\delta$  18.85 (C of  $\gamma$  CH<sub>3</sub>),  $\delta$  17.87 (C of  $\gamma$  CH<sub>3</sub>).

(iii) Boc-Phe(1)-Phe(2)-Val(3)-OH: To 3.68 g (7 mmol) of Boc-Phe(1)-Phe(2)-Val(3)-OMe were added 20 mL MeOH and 8 mL of 1(M) NaOH and the progress of saponification was monitored by thin-layer chromatography (TLC). The reaction mixture was stirred. After 10 h, methanol was removed under vacuum and the residue was taken in 50 mL of water and washed with diethyl ether (2 $\times$ 50 mL). The pH of the aqueous layer was then adjusted to 2–3 using 1(N) HCl,

Supplementary Material (ESI) for *Soft Matter*  
This journal is © The Royal Society of Chemistry 2009

the aqueous layer was extracted with ethyl acetate (2x50 mL). The extract were pooled, dried over anhydrous sodium sulfate and evaporated in vacuum. Yield: 3.06 g (5.98 mmol, 85.47%).

$^1\text{H}$  NMR (300 MHz, DMSO- $d_6$ , 25° C):  $\delta$  12.69 (br, 1H, -COOH),  $\delta$  8.19 (d,  $^3J(\text{H}, \text{H}) = 9.6$  Hz, 1H, NH),  $\delta$  7.95 (d,  $^3J(\text{H}, \text{H}) = 8.4$  Hz, 1H, NH),  $\delta$  7.27–7.07 (m, 10H, aromatic CH),  $\delta$  6.89 (d,  $^3J(\text{H}, \text{H}) = 8.7$  Hz, 1H, NH),  $\delta$  4.71–4.69 (m, 1H,  $\alpha$  CH),  $\delta$  4.20–4.16 (m, 2H, 2 $\alpha$  CH),  $\delta$  3.08–3.02 (m, 1H,  $\beta$  CH<sub>2</sub>),  $\delta$  2.87–2.79 (m, 2H,  $\beta$  CH<sub>2</sub>),  $\delta$  2.68–2.63 (m, 1H,  $\beta$  CH<sub>2</sub>),  $\delta$  2.09–2.05 (m, 1H,  $\beta$  CH),  $\delta$  1.27 (s, 9H, Boc-CH<sub>3</sub>),  $\delta$  0.91–0.83 (m, 6H,  $\gamma$  CH<sub>3</sub>);  $[\alpha]_D^{26}$  -16.66 (c 0.89, CH<sub>3</sub>OH); Anal. Calcd. for C<sub>28</sub>H<sub>37</sub>N<sub>3</sub>O<sub>6</sub> (511.61): C, 65.73; H, 7.29; N, 8.21. Found C, 65.76; H, 7.35; N, 8.15. MS (ESI)  $m/z$  534.36 (M+Na)<sup>+</sup>, 535.38 (M+Na+H)<sup>+</sup>, 550.36 (M+K)<sup>+</sup>;  $^{13}\text{C}$  NMR (75 MHz, DMSO- $d_6$ , 25° C):  $\delta$  172.91 (C of COOH),  $\delta$  171.49 (C of CONH),  $\delta$  171.25 (C of CONH),  $\delta$  155.11 (C of CONH),  $\delta$  138.15 (one phenyl ring C attached with CH<sub>2</sub>),  $\delta$  137.55 (one phenyl ring C attached with CH<sub>2</sub>),  $\delta$  129.48 (2C, *m*-C of phenyl ring),  $\delta$  129.20 (2C, *m*-C of phenyl ring),  $\delta$  128.06 (4C, *o*-C of phenyl ring),  $\delta$  126.35 (*p*-C of phenyl ring),  $\delta$  126.23 (*p*-C of phenyl ring),  $\delta$  78.21 (tertiary C of Boc),  $\delta$  57.24 ( $\alpha$  C),  $\delta$  56.00 ( $\alpha$  C),  $\delta$  53.32 ( $\alpha$  C),  $\delta$  40.34–38.67 (C of DMSO- $d_6$ ),  $\delta$  37.77 ( $\beta$  C),  $\delta$  37.57 ( $\beta$  C),  $\delta$  30.01 ( $\beta$  C),  $\delta$  28.16 (3C, primary C of Boc),  $\delta$  19.18 (C of  $\gamma$  CH<sub>3</sub>),  $\delta$  18.01 (C of  $\gamma$  CH<sub>3</sub>).

Supplementary Material (ESI) for *Soft Matter*

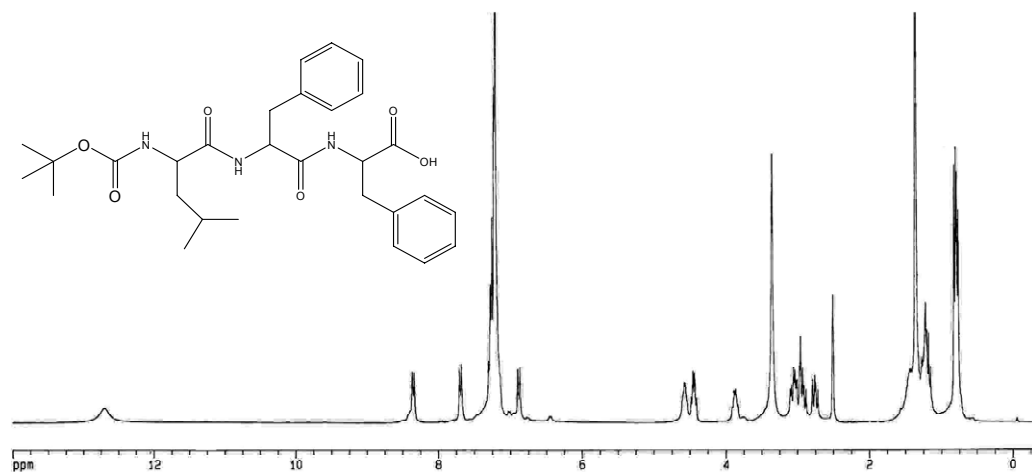

**Figure S1:** 300 MHz NMR Spectrum of Peptide 1

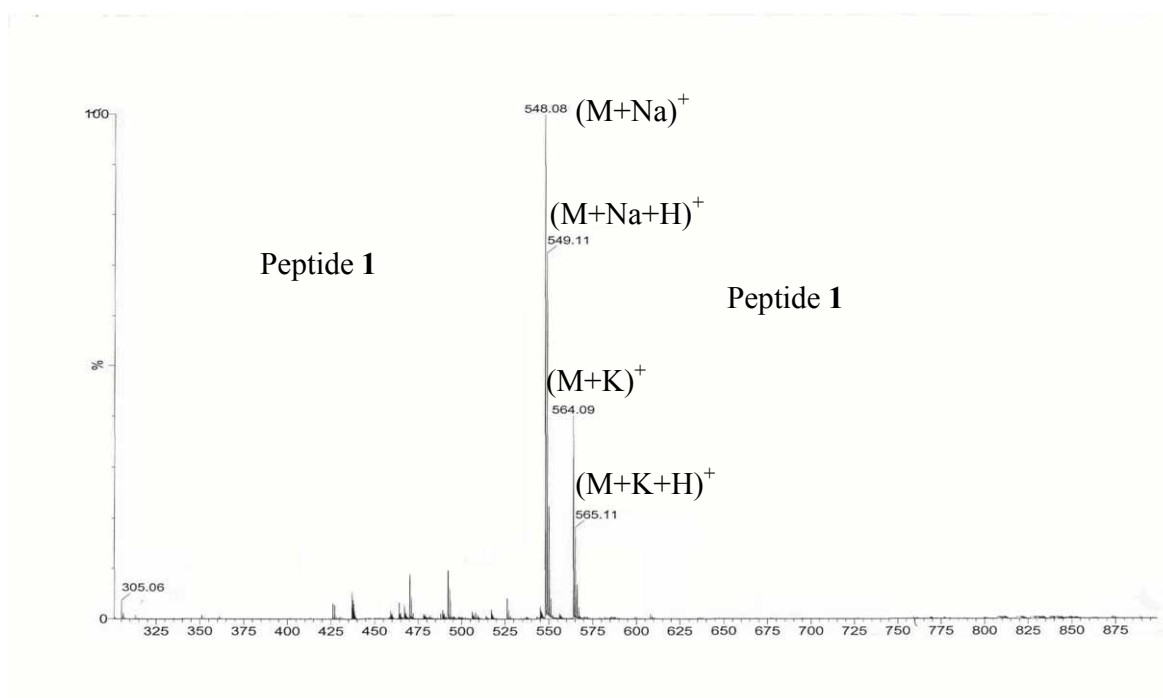

**Figure S2:** ESI-MS Spectrum of Peptide 1

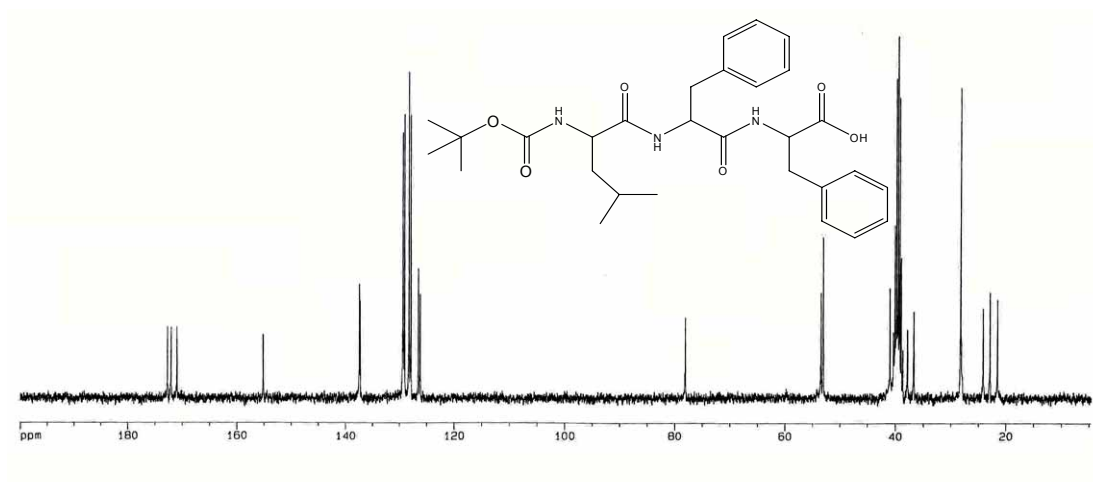

**Figure S3:**  $^{13}\text{C}$  NMR Spectrum of Peptide 1

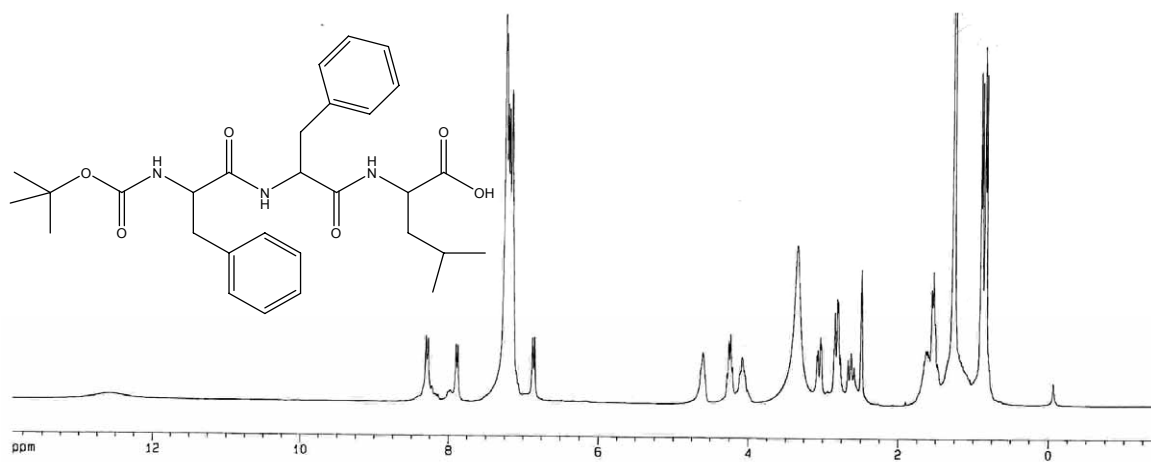

**Figure S4:** 300 MHz NMR Spectrum of Peptide 2

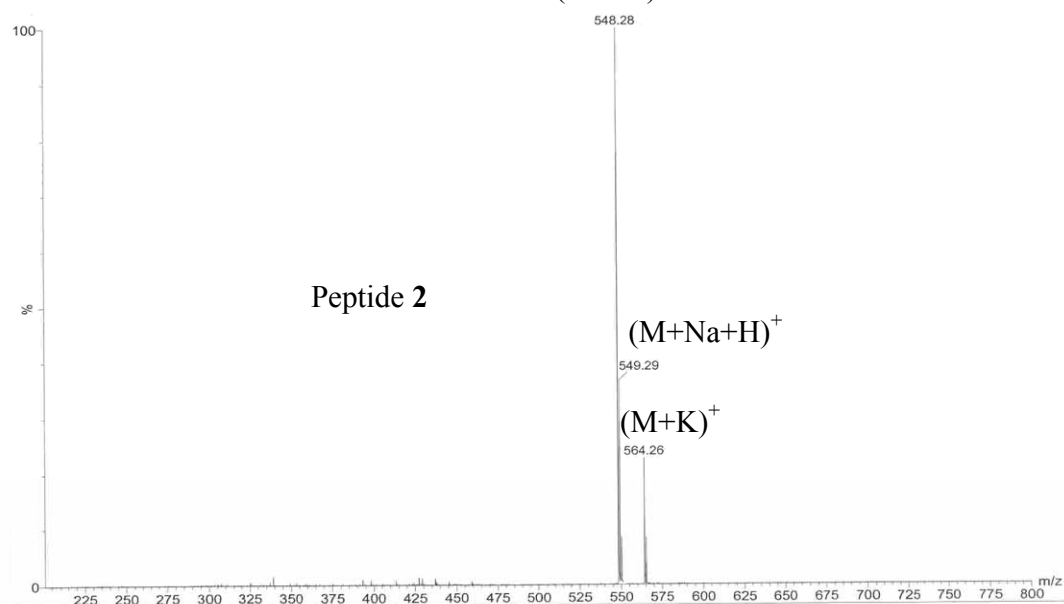

Figure S5: ESI-MS Spectrum of Peptide 2

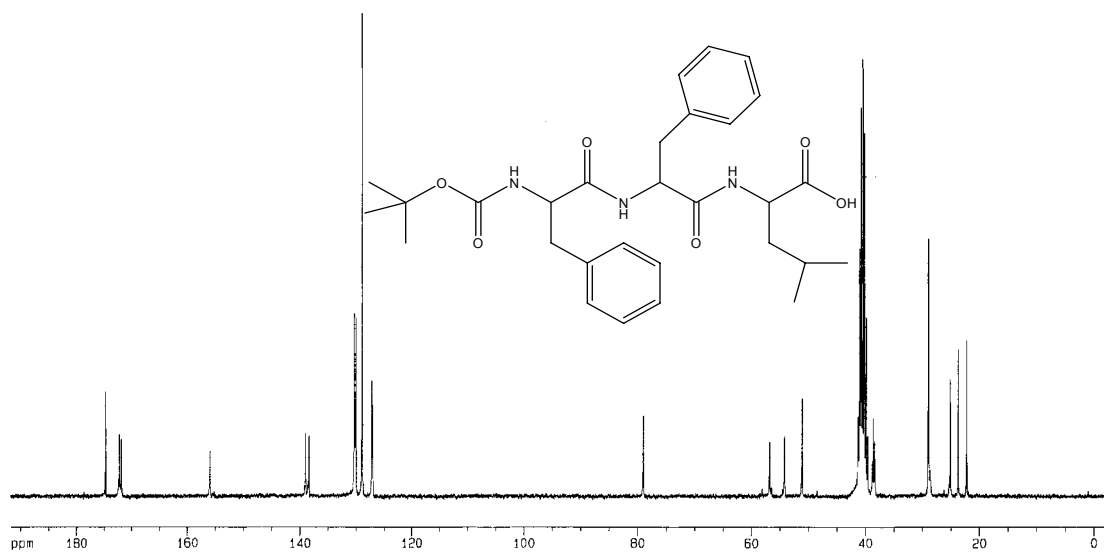

Figure S6: <sup>13</sup>C NMR Spectrum of Peptide 2

Supplementary Material (ESI) for *Soft Matter*

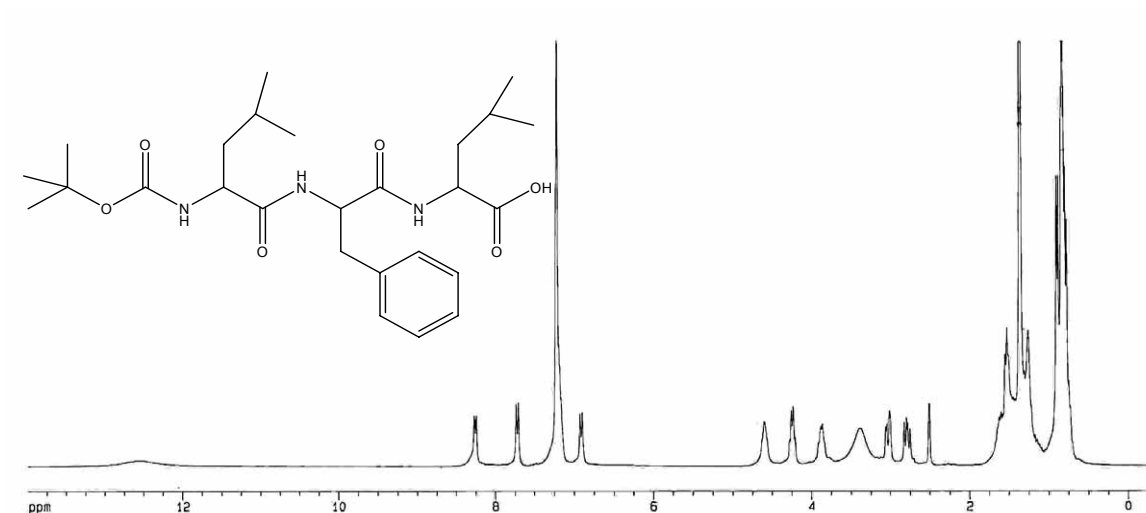

Figure S7: 300 MHz NMR Spectrum of Peptide 3

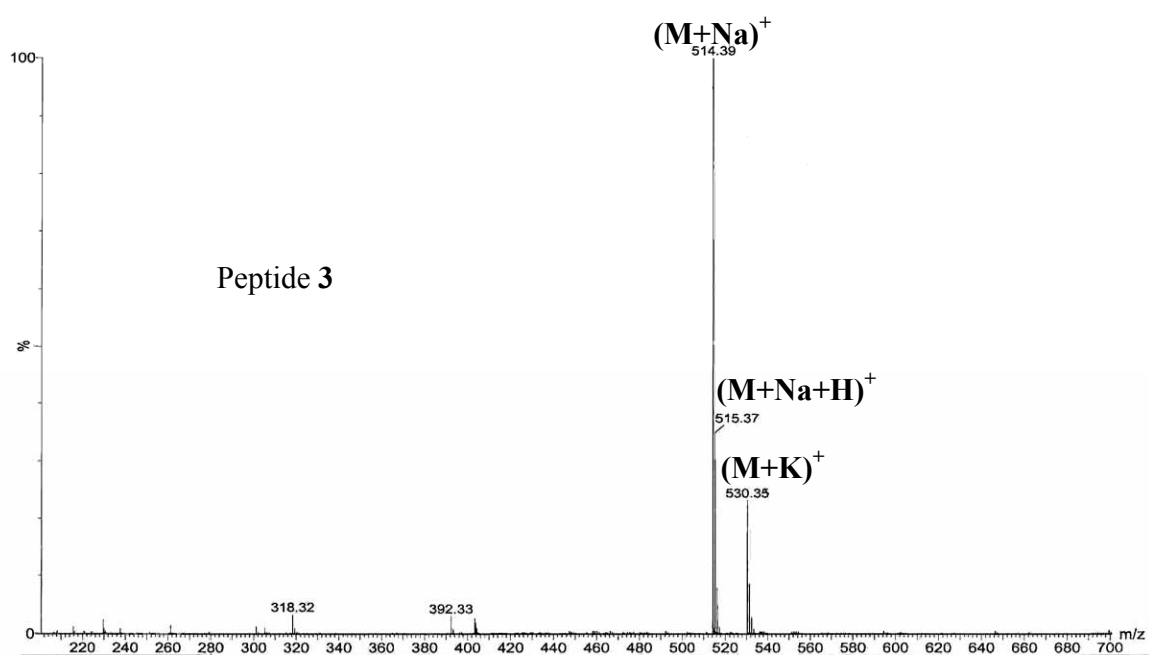

Figure S8: ESI-MS Spectrum of Peptide 3

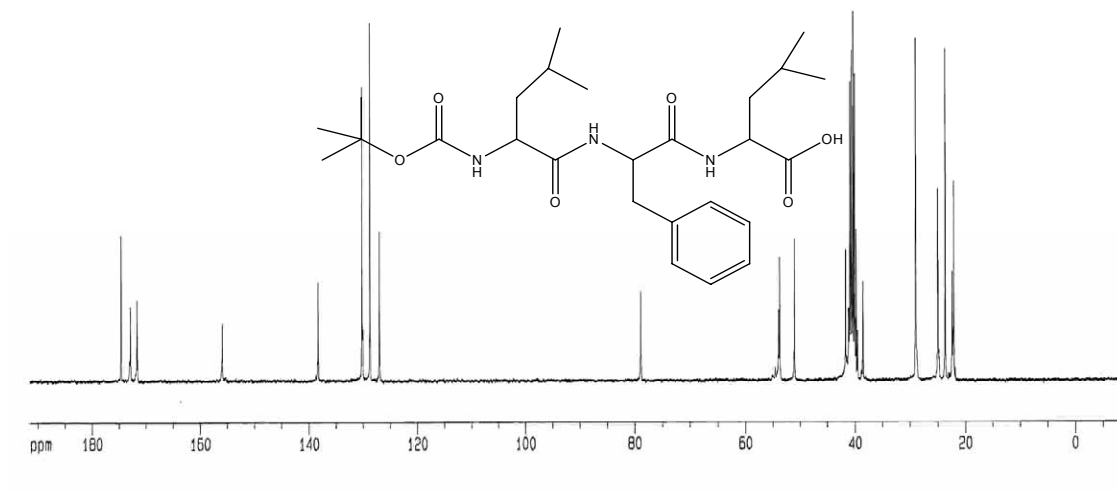

**Figure S9:**  $^{13}\text{C}$  NMR Spectrum of Peptide 3

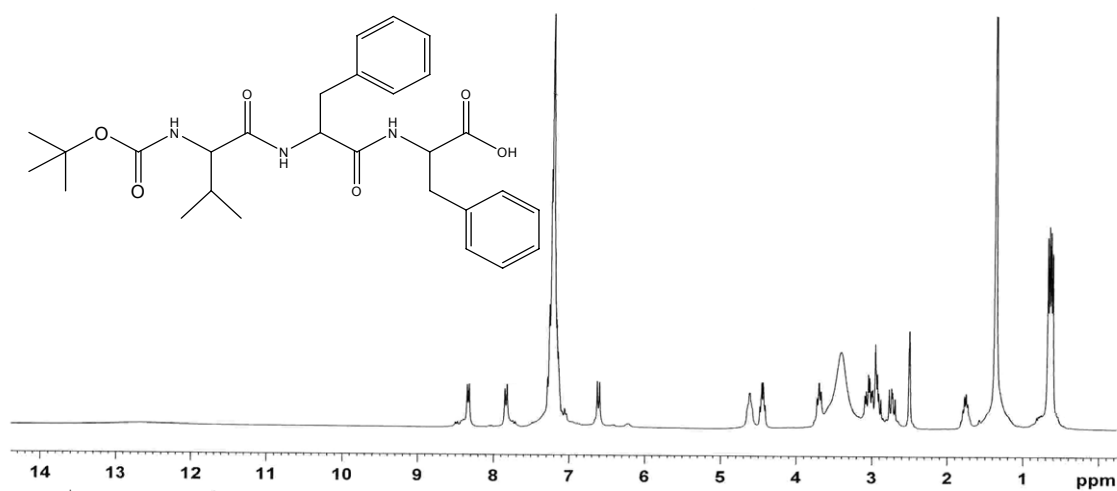

**Figure S10:** 300 MHz NMR Spectrum of Peptide 4

Supplementary Material (ESI) for *Soft Matter*

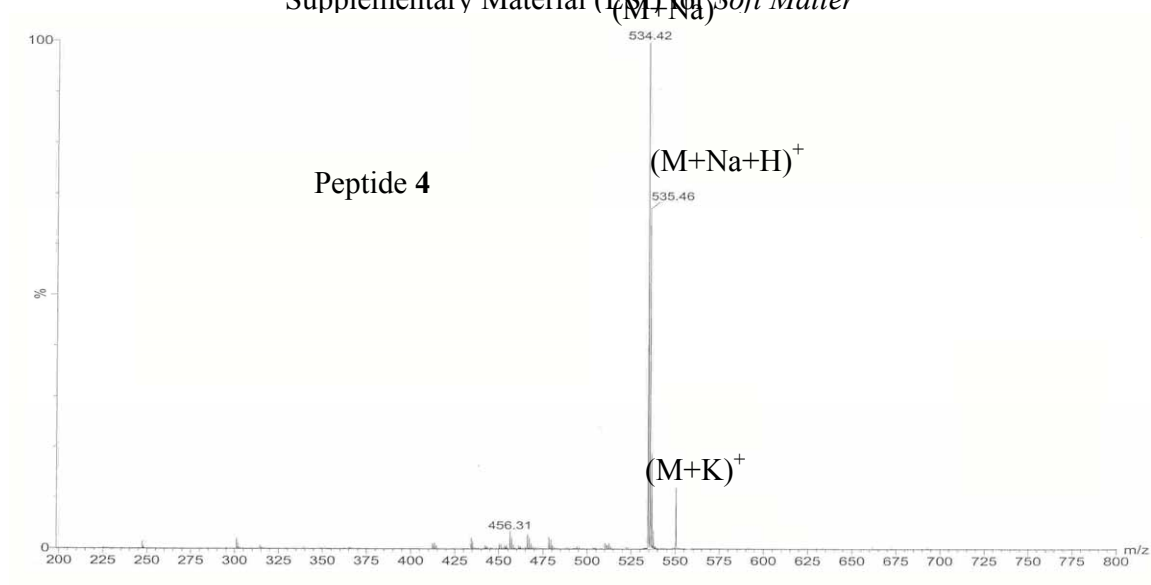

**Figure S11:** ESI-MS Spectrum of Peptide 4

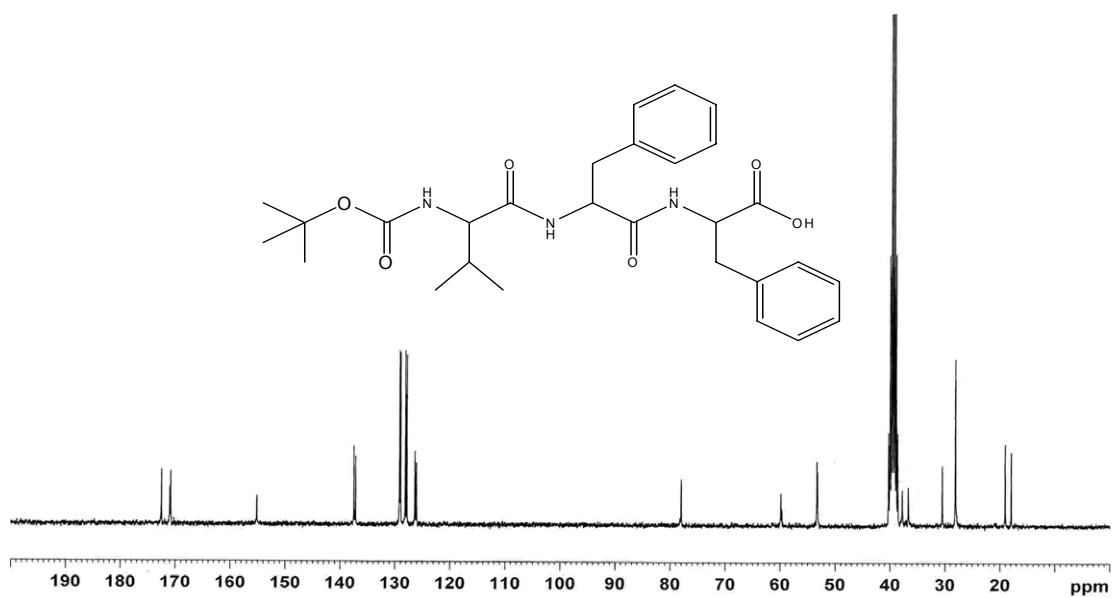

**Figure S12:** <sup>13</sup>C NMR Spectrum of Peptide 4

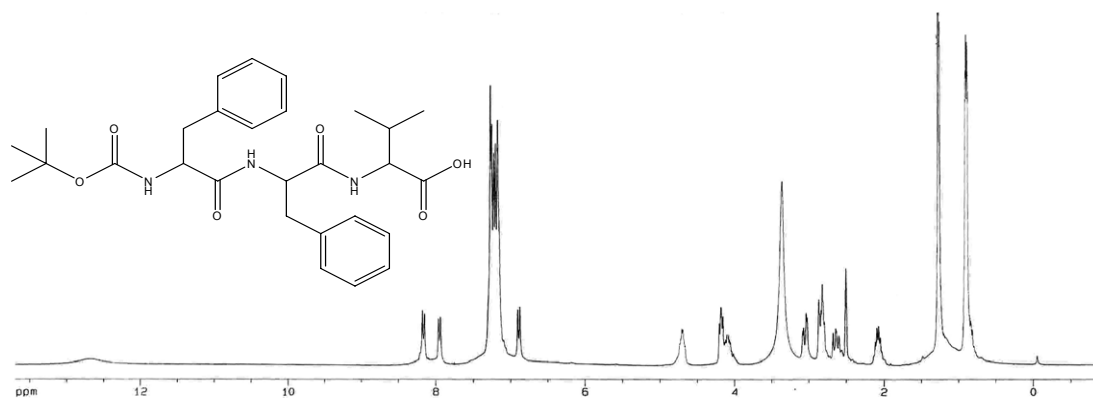

**Figure S13:** 300 MHz NMR Spectrum of Peptide **5**

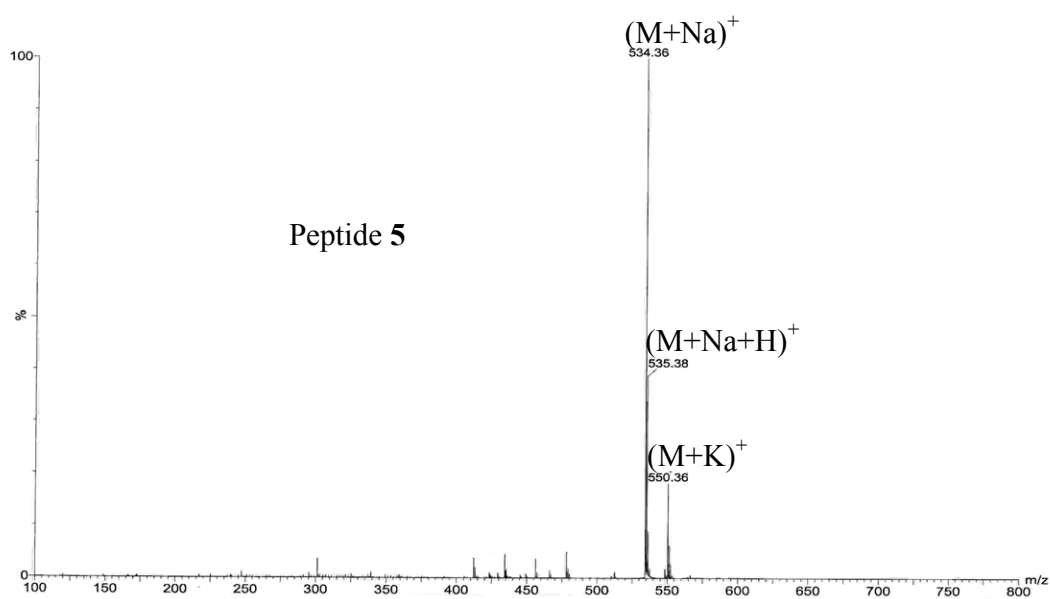

**Figure S14:** ESI-MS Spectrum of Peptide **5**

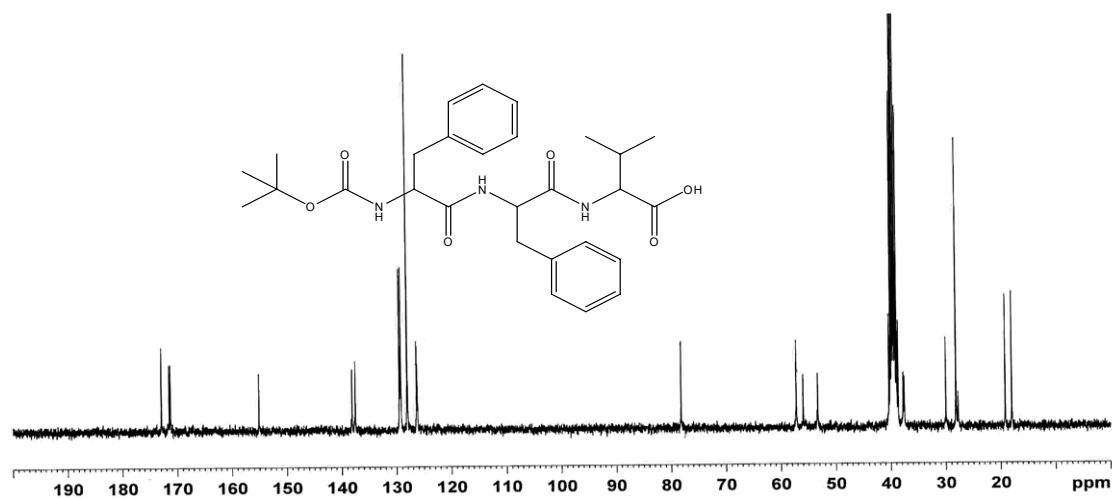

Figure S15:  $^{13}\text{C}$  NMR Spectrum of Peptide 5

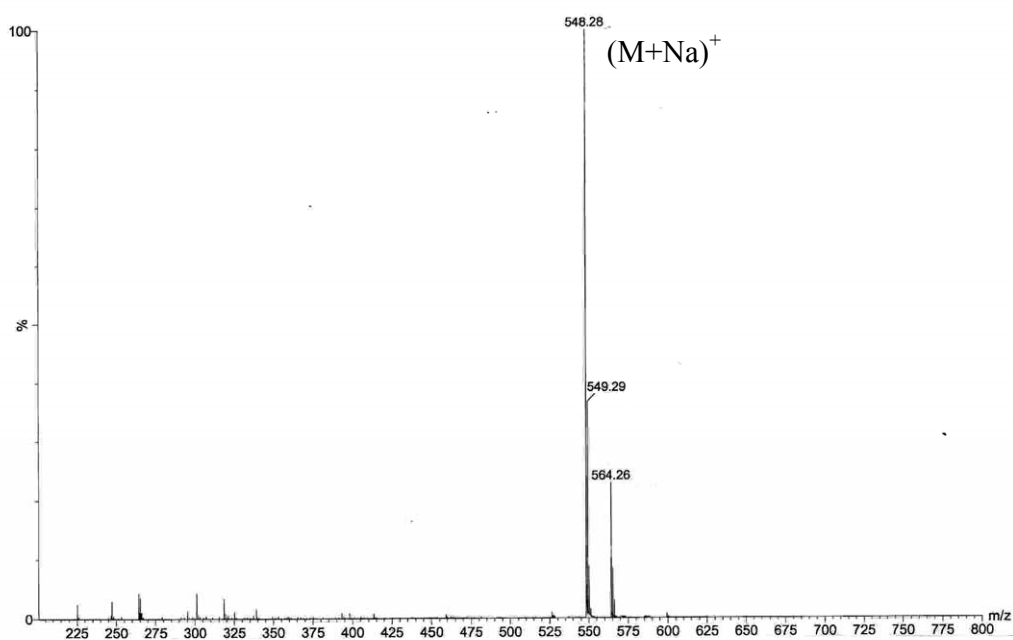

Figure S16: ESI-MS Spectrum of Peptide 2 after recovery from dye encapsulated gel material.

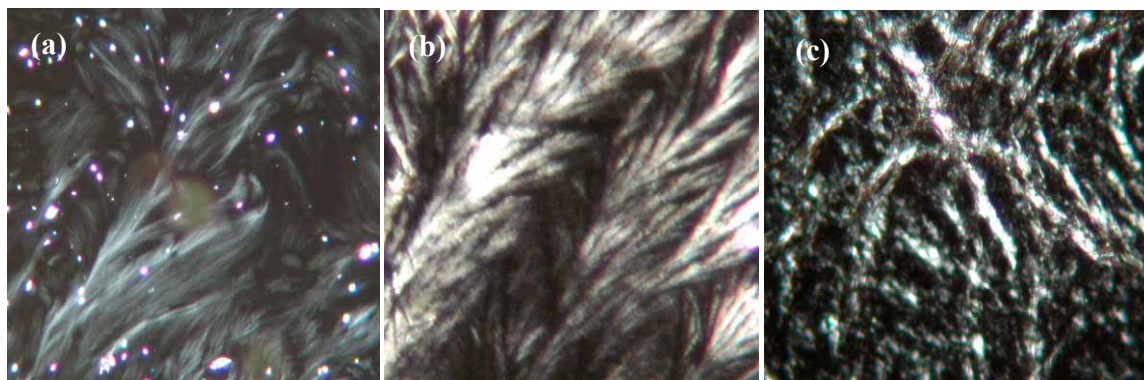

**Figure S17:** POM images of hydrogels obtained from: (a) Peptide 1; (b) Peptide 2 and (c) Peptide 3.

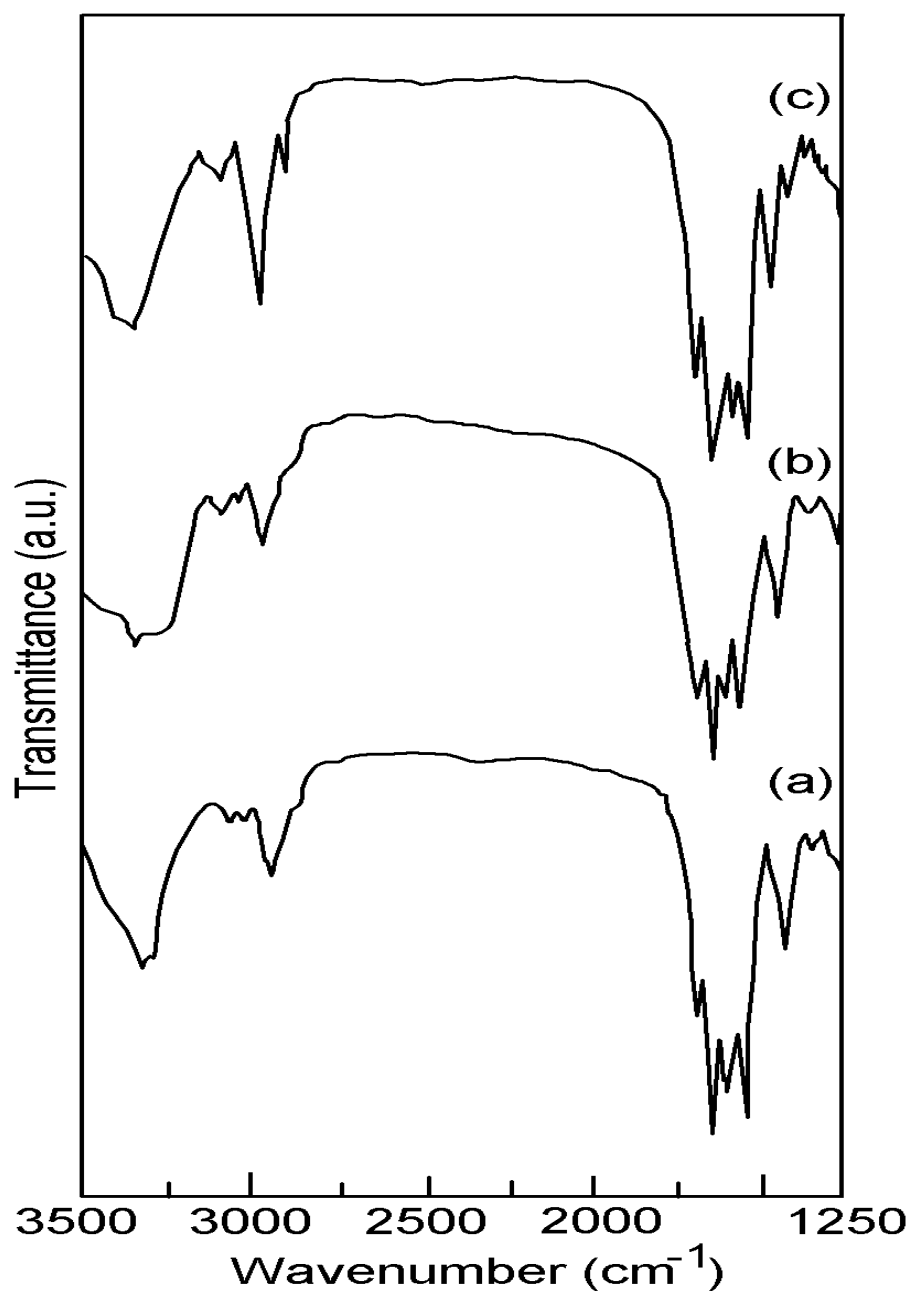

**Figure S18:** FT-IR spectra of Xerogels obtained from: (a) Peptide 1; (b) Peptide 2 and (c) Peptide 3.

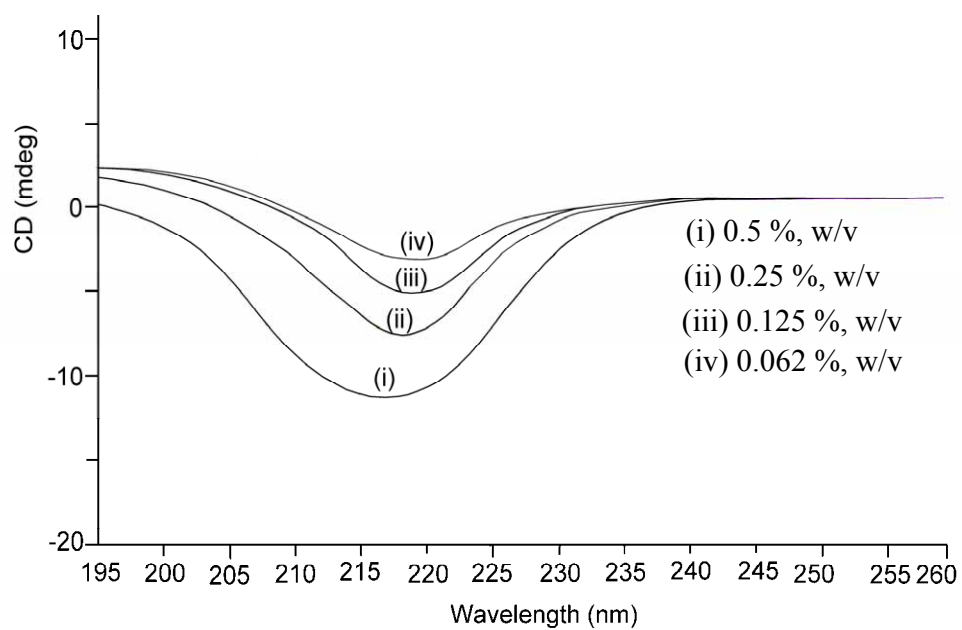

**Figure S19:** CD spectra obtained from Peptide **2** with varying concentrations at room temperature.

**Rhodamine B**

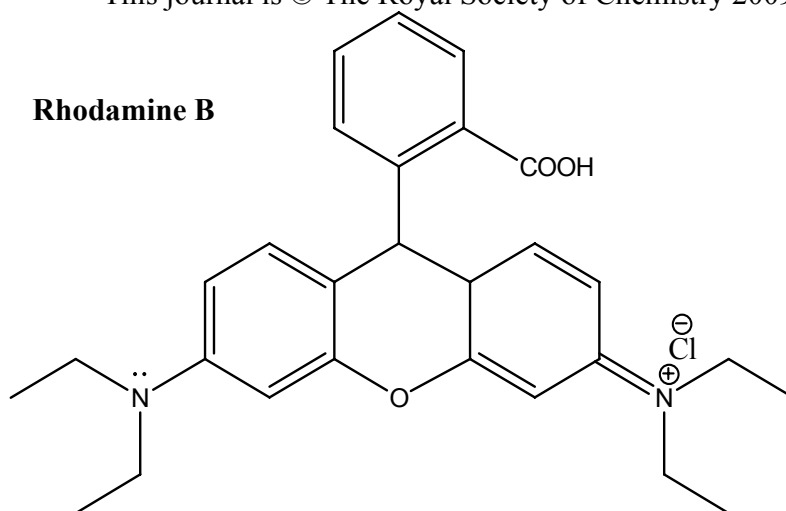

**Reactive Blue 4**

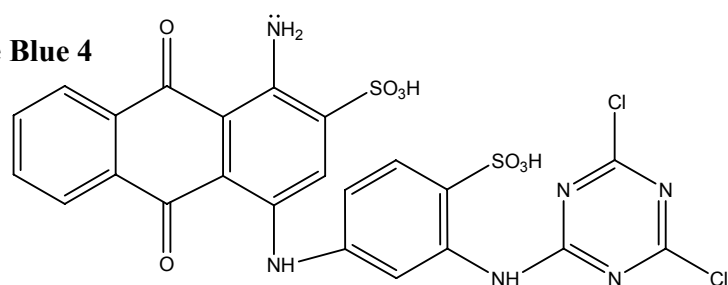

**Direct Red 80**

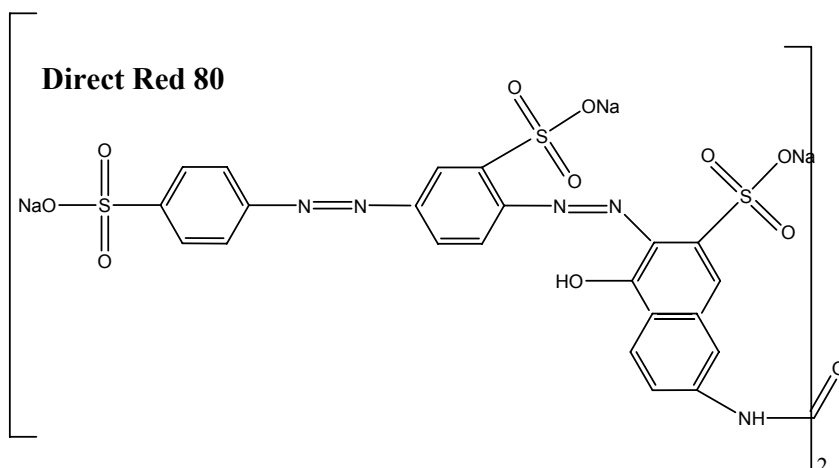

**Figure S20:** Chemical structures of dyes available in waste-water.

**Tables:** **Table S1.** Major peaks found in FT-IR spectra of bulk solid, wet gel and xerogel obtained from peptides **1**, **2** and **3**.

|                        | Gelator Peptide  | Amide A (NH stretching) $\text{cm}^{-1}$ | Amide I ( $>\text{C}=\text{O}$ stretching) $\text{cm}^{-1}$ | Amide II (NH bending) $\text{cm}^{-1}$ | $>\text{C}=\text{O}$ stretching of $-\text{COOH}$ (carboxylic acid) $\text{cm}^{-1}$ | $>\text{C}=\text{O}$ stretching of $-\text{COO}^-$ (carboxylate anion) $\text{cm}^{-1}$ |
|------------------------|------------------|------------------------------------------|-------------------------------------------------------------|----------------------------------------|--------------------------------------------------------------------------------------|-----------------------------------------------------------------------------------------|
| Bulk solid             | Peptide <b>1</b> | 3357                                     | 1693, 1649                                                  | 1524                                   | 1719                                                                                 | —                                                                                       |
|                        | Peptide <b>2</b> | 3353                                     | 1692, 1648                                                  | 1527                                   | 1719                                                                                 | —                                                                                       |
|                        | Peptide <b>3</b> | 3352                                     | 1693, 1649                                                  | 1528                                   | 1721                                                                                 | —                                                                                       |
| Wet gels obtained from | Peptide <b>1</b> | 3295                                     | 1686, 1638                                                  | 1541                                   | —                                                                                    | 1397, 1570                                                                              |
|                        | Peptide <b>2</b> | 3298                                     | 1684, 1636                                                  | 1539                                   | —                                                                                    | 1397, 1570                                                                              |
|                        | Peptide <b>3</b> | 3298                                     | 1690, 1636                                                  | 1541                                   | —                                                                                    | 1398, 1571                                                                              |
| Xerogels obtained from | Peptide <b>1</b> | 3332                                     | 1691, 1642                                                  | 1540                                   | —                                                                                    | 1401, 1587                                                                              |
|                        | Peptide <b>2</b> | 3341                                     | 1692, 1639                                                  | 1543                                   | —                                                                                    | 1399, 1586                                                                              |
|                        | Peptide <b>3</b> | 3343                                     | 1692, 1640                                                  | 1543                                   | —                                                                                    | 1395, 1587                                                                              |

**Table S2.** Major Peaks found in the XRD pattern for Peptides **1**, **2** & **3**.

| Compounds        | d-spacing ( $\text{\AA}$ )                                                                                                |
|------------------|---------------------------------------------------------------------------------------------------------------------------|
| Peptide <b>1</b> | Wet gel: 38.4, 16.43, 13.97, 3.06<br><br>Dried gel: 23.55, 17.94, 15.94, 11.63, 10.34, 7.75, 5.45, 4.64, 3.86, 2.57, 2.18 |
| Peptide <b>2</b> | Wet gel: 39.62, 19.38, 14.57, 6.67, 4.7, 3.07<br><br>Dried gel: 23.69, 12.20, 7.39, 4.62, 3.28, 3.20, 2.51, 2.18          |
| Peptide <b>3</b> | Wet gel: 40.13, 12.26, 4.7, 3.18, 2.49, 2.14<br><br>Dried gel: 22.44, 11.58, 4.61, 3.13                                   |

**References.**

- S1. M. Bodanszky and A. Bodanszky, *The Practice of Peptide Synthesis*, Springer-Verlag: New York, 1984, pp 1–282.  
S2. A. Banerjee, G. Palui and A. Banerjee, *Soft Matter*, 2008, **4**, 1430–1437.  
S3. S. Ray, M. G. B. Drew, A. K Das and A. Banerjee, *Tetrahedron*, 2006, **62**, 7274–7283.
